1 **Title:**

2

3 **The Accuracy of Histopathological and Cytopathological Techniques in the**  
4 **Identification of the Mycetoma Causative Agents**

5

6 **Authors:**

7 Emmanuel Edwar Siddig<sup>1</sup>, Najwa Adam Mhmoud<sup>1</sup>, Sahar Mubarak Bakhiet<sup>1,2</sup>,  
8 Omnia Babekir Abdallah<sup>1</sup>, Salwa Osman Mekki<sup>3</sup>, Nadia I El Dawi<sup>3</sup>, Wendy Van de  
9 Sande<sup>4</sup>, Ahmed Hassan Fahal<sup>1</sup>

10

11 <sup>1</sup>The Mycetoma Research Center, University of Khartoum, Khartoum, Sudan.

12 <sup>2</sup>Institute of Endemic Diseases, University of Khartoum, Khartoum, Sudan.

13 <sup>3</sup>Department of Histopathology, Soba University Hospital. University of Khartoum.

14 <sup>4</sup>Department of Medical Microbiology and Infectious Diseases, Erasmus Medical  
15 Centre, University of Rotterdam, Rotterdam, The Netherlands

16

17

18 **Corresponding Author**

19 Ahmed Hassan Fahal, Professor of Surgery, The Mycetoma Research Center,  
20 University of Khartoum, Khartoum, Sudan. [ahfahal@hotmail.com](mailto:ahfahal@hotmail.com)–

21 [ahfahal@uofk.edu](mailto:ahfahal@uofk.edu)

22

23 **Abstract:**

24 Mycetoma is a devastating neglected tropical disease, caused by various fungal  
25 and bacterial pathogens. Correct diagnosis to the species level is mandatory for  
26 proper treatment. In endemic areas, various diagnostic tests and techniques are  
27 in use to achieve that, and that includes grain culture, surgical biopsy  
28 histopathological examination, fine needle aspiration cytological (FNAC)  
29 examination and in certain centres molecular diagnosis such as PCR.

30 In this retrospective study, the sensitivity, specificity and diagnostic accuracy of  
31 grain culture, surgical biopsy histopathological examination and FNAC to identify  
32 the mycetoma causative organisms were determined. The histopathological  
33 examination appeared to have better sensitivity and specificity.

34 The histological examination results were correct in 714 (97.5%) out of 750  
35 patients infected with *Madurella mycetomatis*, in 133 (93.6%) out of 142 patients  
36 infected with *Streptomyces somaliensis*, in 53 (74.6%) out of 71 patients infected  
37 with *Actinoadura madurae* and in 12 (75%) out of 16 patients infected with  
38 *Actinoadura pelletierii*.

39 FNAC results were correct in 604 (80.5%) out of 750 patients with *Madurella*  
40 *mycetomatis* eumycetoma, in 50 (37.5%) out of 133 *Streptomyces somaliensis*  
41 patients, 43 (60.5%) out of 71 *Actinoadura madurae* patients and 11 (68.7%) out  
42 of 16 *Actinoadura pelletierii*. The mean time required to obtain the FNAC result  
43 was one day, and for the histopathological examinations results it was 3.5 days,  
44 and for grain, it was a mean of 16 days.

45 In conclusion, histopathological examination and FNAC are more practical  
46 techniques for rapid species identification than grain culture in many endemic  
47 regions.

48

49

50 **Author summary**

51 In mycetoma endemic regions, the medical and health settings are commonly  
52 suboptimal, and only a few diagnostic tests and techniques are available. That had  
53 badly affected the patients' proper diagnosis and management and thus the late

54 presentation of patients with advanced disease. In this retrospective study, the  
55 experience of the MRC on the common in use diagnostic tests in the period  
56 between 1991 and 2018 is presented.

57 In this study, the sensitivity, specificity rates and diagnostic accuracy of grain  
58 culture, surgical biopsy histopathological examination and FNAC to identify the  
59 mycetoma causative organisms were determined. The histopathological  
60 examination appeared to have better sensitivity and specificity. Furthermore, the  
61 grain culture identification needs high experience, it is the tedious procedure, and  
62 cross-contamination is common hence misdiagnosis is frequent. It can be  
63 concluded that histopathological examination and FNAC are more practical  
64 techniques for rapid species identification than grain culture in many endemic  
65 regions with poor diagnostic setting.

66

67

## 68 **Introduction:**

69 Mycetoma is a chronic granulomatous subcutaneous inflammatory infection  
70 endemic in subtropical and tropical regions, but it is reported globally [1,2]. It is  
71 characterised by a painless subcutaneous swelling, multiple sinuses formation and  
72 a discharge that contain grains [3,4]. The clinical presentation can give a clue to  
73 the diagnosis, but without further diagnostic testing it will to misdiagnosis and  
74 inaccurate treatment [5]. Mycetoma can be caused by different bacteria  
75 (actinomycetoma) or fungi (eumycetoma) [6,7]. More than 70 different micro-  
76 organisms were reported to cause this infection, and hence it is essential to identify  
77 the causative agents to the species level for appropriate treatment [8,9]. In  
78 endemic regions, the most commonly used tools are culturing of the grains,  
79 surgical biopsy followed by histopathological examination and fine needle  
80 aspiration cytological (FNAC) examination [10,11].

81 Currently, culturing the grains culture is still considered to be the golden standard  
82 for species identification in many centres [12,13]. However, this technique is  
83 tedious, time-consuming due to the slow growth rate and it needs expert  
84 microbiologists to identify the causative agents based on the macroscopic

85 appearance of the isolates. Furthermore contamination is common. Patients on  
86 medical treatment may have non-viable gains, and hence it is difficult to identify  
87 the causative organism [14,15].

88 To overcome these difficulties, histological examination is often used  
89 complementary to culture. In a histopathological examination, it is easy to  
90 discriminate between fungal and bacterial causative agents [16,17]. However,  
91 identification to the species level is more challenging and considered far from  
92 reliable [18,19]. At the Mycetoma Research Centre (MRC), University of Khartoum,  
93 Khartoum, Sudan FNAC is a common tool to identify the causative organisms. It is  
94 less invasive, and time-consuming compared to the histopathological and culture  
95 techniques [20,21]. However, to the best of our knowledge there was no study  
96 performed in which the sensitivity and specificity of the three techniques for the  
97 identification of the mycetoma causative organisms were compared. With this  
98 background, this study was conducted at the Mycetoma Research Centre were  
99 8500 confirmed mycetoma patients were seen and treated. In this retrospective  
100 study, the records of these patients were reviewed, and patients who undergone  
101 the three diagnostic tests were included.

102

103

## 104 **Materials and Methods**

### 105 **Study cohort**

106 Following the Mycetoma Research Centre Institutional Review Board ethical  
107 approval, all the histopathological, cytological and microbiological reports of the  
108 patients seen in the Mycetoma Research Centre over a 27-year period (January  
109 1991 to January 2018) were reviewed. The data were collected in the pre-designed  
110 data collection sheet. The data analysis was anonymised The patient demographic  
111 characteristics, results of the three techniques were collected.

112 .

113 In this study, only patients in whom the causative organisms were identified by  
114 culture and had undergone both a fine needle aspirate for cytological examination

115 and deep-seated excisional biopsy for histopathological examination were  
116 included. (Fig. 1).

117

118 The diagnostic accuracy of these techniques for identification of the causative  
119 agents was calculated as the percentage of cases with culture identification divided  
120 by the number of cases with species identified by histopathological or cytological  
121 techniques.

122

123

#### 124 **Grains isolation**

125 The grains were obtained by surgical biopsy and/or FNAC. For the latter, a 25-  
126 gauge needle was inserted into the lesion, and aspirates were taken. The yield of  
127 grains was assessed visually by the number and size of grains obtained. If the  
128 yield was low, a second aspiration was taken with a 23-gauge needle. When  
129 excessive bleeding from the lesions was encountered, a 27-gauge needle was  
130 used. The obtained sample usual spiltted into two parts; one was transported  
131 immediately to the microbiology department for culturing, the other part was sent  
132 to the histology department for histopathological and cytological.

133

#### 134 **Grains culture**

135 The mycetoma grains were washed three times in sterile normal saline and cultured  
136 on Sabaroud dextrose agar with gentamicin for fungal grains. The actinomycetoma  
137 gains were cultured in Yeast Extract agar. Grains were incubated at 37°C and growth  
138 was checked daily. The isolates were identified by their microscopical appearance  
139 and biochemical testing.

140

141

#### 142 **Cytological Examination**

143 The aspirate was allowed to air dry and was stained using Diff-Quick stain. The  
144 stained aspirates were examined by an expert histopathologist for the presence of  
145 the following cytomorphological features: smears cellularity, the host inflammatory

146 tissue reaction, the presence and types of the causative organisms' grains. Species  
147 identification was based on species-specific criteria. In general, *M. mycetomatis*  
148 grains can be either small or large, are light to dark brown in colour and have  
149 irregular outlines and a crushing artefact when stained with hematoxylin and eosin  
150 (H&E) (Fig. 2A).

151 *S. somaliensis* grains are difficult to see in H&E stained sections, they stain bright  
152 pink to hazy pink in colour, are often oval to irregular shaped and can be as  
153 aggregates (Fig. 2C).

154 *A. madurae* grains are small oval shaped, and it stained pink to red colour in H&E  
155 and tend to be as one mass without any fractures. *A. pelletierii* grains are small  
156 rounded to oval shaped, and they stained deep blue in H&E stained sections and  
157 tend to be fractured.

158

### 159 **Histopathological Examination**

160 All patients underwent surgical biopsy under anaesthesia, which was fixed in 10%  
161 formalin and processed further into paraffin blocks. 3-5- $\mu$ m sections were obtained  
162 and stained with H&E. Species identification was made based on species-specific  
163 criteria. *M. mycetomatis* grains tend to be large, light to dark brown in colour with  
164 irregular outlines. They tend to fracture when sections are cut. *M. mycetomatis* has  
165 two different types of grains, and these are the filamentous and vesicular. The  
166 filamentous type, is the most common type and consists of brown septated and  
167 branched hyphae that may be slightly more swollen towards the edges (Fig. 3D).

168

169 *S. somaliensis* grains are rounded to oval in shape, with homogenous appearance  
170 in tissue sections. They appear faint yellow in unstained sections, and the grains are  
171 not well stained with H&E. Moreover, as a result of sectioning they may show  
172 longitudinal cracks, the filaments are fine (measured between 0.5 – 2  $\mu$ m in  
173 diameter), closely packaged and embedded in cement matrix (Fig. 3B).

174

175 *A. pelletierii* grains are small, round to oval in shape and semicircular and sickle like  
176 shapes have been observed as well. The filamentous structures are pretty difficult

177 to be detected. However, a careful and meticulous examination of the periphery of  
178 the grains may show some of them. *A. pelletierii* grains stain deep violet with H&E,  
179 which is very characteristic and allows the definitive diagnosis without a need for  
180 culturing techniques (Fig. 3C).

181

182 *A. madurae* grains ranged from yellow to white. Therefore, it can be difficult to  
183 discriminate them from the surrounding fat. Histologically the grain size ranges from  
184 small to large. The large grains have a characteristic variegated pattern. The  
185 periphery of the grain is opaque, homogenous and deep purple when stained with  
186 H&E stain, while the centre is less densely stained. Additionally, the periphery of the  
187 grains shows an eosinophilic material (Fig. 3A). Smaller grains are more  
188 homogeneous and are difficult to distinguish from *A. pelletierii*. However, even the  
189 small grains of *A. madurae* have a more deeply stained purple fringe, which is not  
190 seen in *A. pelletierii*.

191

192

### 193 **Results:**

194 In this study, 991 patients out of 7940 patients were eligible and were included in  
195 the analysis. Their ages ranged between 5 and 75 years old. The majority were  
196 males 737 (74.3%), and most of them were students 327 (32.9%) and farmers 167  
197 (16.8%). The majority of the patients (837 out of 991), gave a history of discharge  
198 that contained grains and the majority of these grains were black (565; 57%)  
199 followed by yellow (104;10.5%), white (60; 6.1%) and red grains (14; 1.4%). In this  
200 cohort, the majority of patients, (72.6%) had no history of local trauma, only  
201 (19.3%) patients did recall a local trauma and the remaining 73 (7.4%) patients were  
202 not certain.

203

204 Based on the culture reports of the grains, in 750/991 (75.6%) of the patients the  
205 mycetoma was caused by *M. mycetomatis*, in 142/991 (14.4%) it was caused by *S.*  
206 *somaliensis*, in 71/991 (7.16%) it was caused by *A. madurae* and in 16/991 (1.6%)  
207 it was caused by *A. pelletieri*. In 11 patients no growth was reported from the grains

208 obtained during the sample collection. The time to growth differed case by case and  
209 ranged between 5 and 28 days.

210

211 In this study, out of the 991 mycetoma cases, the correct species identification was  
212 obtained for 912 cases using histopathological examination. Using FNAC, the  
213 correct diagnosis was obtained in 708 cases. The histopathological examination  
214 confirmed the diagnosis of *M. mycetomatis* in 714 of 750 cases with 95.2%  
215 sensitivity, 95.4% specificity and diagnostic accuracy of 95.3%. For FNAC only 604  
216 out of 750 *M. mycetomatis* cases were identified, resulting in a sensitivity of 80.5%,  
217 a specificity of 88.4% and a diagnostic accuracy of 82.4%.

218 Out of 142 *S. somaliensis* cases, 133 were also identified with histopathological  
219 examination with 93.7% sensitivity, 98.9% specificity and diagnostic accuracy of  
220 98.2%. With FNAC only 50 out of 133 *S. somaliensis* cases were identified, resulting  
221 in a sensitivity of 35.2%, a specificity of 99.3% and a diagnostic accuracy of 90.1%.  
222 53 out of 71 cases with *A. madurae* identification were identified by  
223 histopathological examination, with a sensitivity of 74.7%, 99.5 % specificity and  
224 diagnostic accuracy of 97.7%. FNAC identified 43 out of 71 cases with a sensitivity  
225 of 60.6%, specificity of 94.4 % and diagnostic accuracy of 91.9%.

226

227 For *A. pelletierii* out of 16 cases; 12 were also identified with histological examination  
228 with 75.0% sensitivity, 100% specificity, and diagnostic accuracy of 99.6%. For  
229 FNAC a sensitivity of 68.8%, a specificity of 99.7% and a diagnostic accuracy of  
230 99.2% were obtained.

231

232 With the histopathological examination, false negative result was reported in 36/750  
233 *M. mycetomatis* cases, 9/142 *S. somaliensis* cases, 18/71 *A. madurae* cases and  
234 4/16 *A. pelletierii* cases. To determine the false negative results reasons, the  
235 histopathological slides were re-examined. There were various reasons for the false  
236 negative, and that included the absence of mycetoma histopathological architecture  
237 resulted in overlooking the causative agent (Fig 4). Furthermore, in some blocks, the  
238 grains were absent, either because the tissue was not homogenously infected by



239 the causative agent and that the part which was taken for histology or the section  
240 contained no grains.

241 This latter might be overcome by examining multiple sections at different depths of  
242 the histology blocks especially when inflammation and necrosis are noted.

243

244 False positive results were obtained in 28 of the cases. This was attributed to the  
245 presences of numerous structures that can mimic the appearance of *M. mycetomatis*  
246 and that included vegetables, synthetic fibres and algae (Fig 5) which can resemble  
247 fungal hyphae and calcification (Fig 5.). In overall, using histology correct species  
248 identification was obtained in the majority of cases.

249

250 The mean time to identify the culture isolates was 16 days (range 5 to 28 days), for  
251 histology it was 3.5 days (range 2 to 5 days), and for cytology, it was one day (range  
252 1 to 2 days). This demonstrated that reliable species identification using histology  
253 was obtained in 92.0% of cases within an average time reduction of 13.5 days, for  
254 cytology this was 71.4% of cases with time reduction of 15 days, indicating that  
255 adding histology or cytology to the diagnostic techniques used for species  
256 identification resulted in an earlier start of treatment.

257

## 258 **Discussion:**

259 The accurate identification of mycetoma causative agents is considered the  
260 cornerstone for the initiation of appropriate therapy. Hence a rapid and accurate  
261 diagnostic tool to achieve the definitive species identification is considered a critical  
262 part in patient treatment and management [21-23]. Different laboratory techniques  
263 for species identification are in use, including culture, histopathology, [7, 25], FNAC  
264 [8, 24], serological assays and imaging [26 - 29] as well as different molecular  
265 diagnostic tools [30 - 35]. However, not all these assays are available in endemic  
266 regions. In the Mycetoma Research Centre, culturing of the grains, histopathology  
267 and FNAC are routinely performed and have been used for the past 27 years. In this  
268 communication we have used the data collected for the last 27 years to assess the  
269 sensitivity, specificity and diagnostic accuracy of histopathology and cytology in the

270 identification of mycetoma causative agents in comparison to the current golden  
271 standard: culturing.

272 This study showed that the histopathology was more accurate to FNAC in terms of  
273 species identification. Our results are in line with that reported previously by Yousif  
274 and colleagues [36]. They reported 90.9% agreement when histopathology was  
275 compared to FNAC for the diagnosis of *M. mycetomatis* (90.9%) while for  
276 actinomycetoma causative agents it was only 60%. The lower diagnostic agreement  
277 of actinomycetoma causative agents could have been caused by morphological  
278 similarities of these microorganisms. Furthermore, both techniques are operator  
279 dependent and need intensive training and experience which could have its  
280 reflections on the accuracy.

281

282 Mycetoma can be caused by more than 70 different causative agents [37], but the  
283 distribution of these species is not everywhere the same which could cause  
284 differences in diagnostic accuracy in different regions. In some of the mycetoma  
285 endemic regions, mycetoma is caused by closely related species. Morphologically  
286 these organisms may look similar which could cause a challenge in the identification  
287 of these organisms. In Mexico, the most common causative agents are *Nocardia*  
288 *brasiliensis* and *Nocardia asteroides* [37], two closely related species which are  
289 difficult to differentiate from each other based on histopathology [38, 39]. In Senegal,  
290 the most common causative agents of eumycetoma are *M. mycetomatis* and  
291 *Falciformispora senegalensis* which both can cause black grain mycetoma [37, 40].  
292 In the black grains of *F. senegalensis*, the centre is non-pigmented, and the cement  
293 is absent, whereas at the peripheries the grains are dark coloured and brown cement  
294 is present. However, this is also seen in black grains of *Trematosphaeria grisea* and  
295 certain grains of *M. mycetomatis*. Hence an expert pathologist is needed to  
296 differentiate between these organisms [41].

297

298 The study performed here was a retrospective study, looking back at the records of  
299 the Mycetoma Research Centre for the past 27 years. During that time molecular  
300 identification of the causative agents was not performed and culture was considered

301 the golden standard. Recently in the study conducted by Borman and colleagues  
302 demonstrated that using morphological identification, misidentifications occurred in  
303 many cases [42]. Out of 28 previously identified *Trematosphaeria grisea* isolates, 22  
304 were, other fungal species [42]. For actinomycetoma causative organisms,  
305 misidentifications also have been described. In 2008, Quintana and associates  
306 demonstrated that half of the *S. somaliensis* isolates obtained from Sudan appeared  
307 to be *Streptomyces sudanensis* [43]. Furthermore, next to *A. madurae* and *A.*  
308 *pelletieri* also *Actinomadura latina* was described [44].

309

310 In this study, the sensitivity of histopathological technique was superior to that FNAC  
311 for all species tested. In that study they studied the performance of FNAC in  
312 comparison to histology in 19 different mycetoma patients. Out of these 19 patients,  
313 five patients had to be excluded due to inadequate aspirated materials. From the 14  
314 remaining patients, 10 were diagnosed as *M. mycetomatis* with histopathology, and  
315 4 were actinomycetoma. With this limited number of patients, they could conclude  
316 that FNAC could identify the causative agent in 9 out of 10 *M. mycetomatis* patients.  
317 One patient identified by histology could not be identified with cytology, again  
318 confirming that histology was superior to FNAC in respect to species identification  
319 [15]. A result confirmed in our current study, as in our study 146 patients with *M.*  
320 *mycetomatis* mycetoma were missed with FNAC. However, of the three different  
321 identification methods used, FNAC was the most rapid and resulted in a species  
322 identification within 1 day, instead of 3.5 days for histology or 16 days for culture.  
323 FNAC is a simple and rapid diagnostic technique which can be used at the one-stop  
324 diagnosis clinic and in epidemiological and field surveys. However, it has many  
325 limitations: it is an operator dependent technique, can be painful and can lead to  
326 deep-seated bacterial infection. At the moment the fine needle aspirate is often taken  
327 blindly without guidance of ultrasound imaging which creates a risk that the operator  
328 might miss the pockets which contains grains. With the use of the ultrasound-guided  
329 aspiration, the diagnostic yield of the technique will improve which in its turn could  
330 enhance the number of cases in which a positive species identification might be  
331 obtained.

332

333 The grains culture remains in many centres the cornerstone for the diagnosis of  
334 mycetoma. However it is a time-consuming procedure and an experienced  
335 microbiologist is needed to identify the organisms to the species level. Cross-  
336 contamination is a common problem. However, by complementing culturing with  
337 histology or FNAC a preliminary identification might be obtained earlier.

338

339

340

341

342 **References:**

- 343 1- Reis CMS, Reis-Filho EGM. Mycetomas: an epidemiological, etiological,  
344 clinical, laboratory and therapeutic review. *An Bras Dermatol.* 2018; 93  
345 (1):8-18.
- 346 2- Fahal AH. Mycetoma: A global medical and socio-economic dilemma. *PLoS*  
347 *Negl Trop Dis.* 2017; 11(4): e0005509.
- 348 3- Zijlstra EE, van de Sande WWJ, Fahal AH. Mycetoma: A Long Journey from  
349 Neglect. *PLoS Negl Trop Dis.* 2016; 10(1): e0004244.
- 350 4- Suleiman SH, Wadaella ES, Fahal AH. The Surgical Treatment of  
351 Mycetoma. *PLoS Negl Trop Dis.* 2016; 10(6): e0004690.
- 352 5- Wendy van de Sande, Ahmed Fahal, Sarah Abdalla Ahmed, Julian Alberto  
353 Serrano, Alexandro Bonifaz, Ed Zijlstra, on behalf of the eumycetoma  
354 working group; Closing the mycetoma knowledge gap, *Medical Mycology*,  
355 2018; 56(supp 1):153–164.
- 356 6- Fahal A, Mahgoub ES, Hassan AME, Abdel-Rahman ME. Mycetoma in the  
357 Sudan: An Update from the Mycetoma Research Centre, University of  
358 Khartoum, Sudan. *PLoS Negl Trop Dis.* 2015; 9(3): e0003679.
- 359 7- Siddig EE, Fahal AH. Histopathological Approach in Diagnosis of Mycetoma  
360 Causative Agents: A Mini Review. *J Cytol Histol.* 2017; 8: 466.

- 361 8- Siddig EE, Yousif BM, Edris AM, Fahal AH. The Touch Imprint Cytology: A  
362 simple method for the diagnosis of mycetoma causative agents. Khartoum  
363 Medical Journal. 2016; 9(1):1211 – 1216.
- 364 9- Ahmed AA, van de Sande W, Fahal AH. Mycetoma laboratory diagnosis:  
365 Review article. PLoS Negl Trop Dis. 2017; 11(8): e0005638.
- 366 10-Verghese A, Klokke AH. Histologic diagnosis of species of fungus causing  
367 mycetoma. Indian J Med Res. 1966; 54: 524–530.
- 368 11-Alam K, Maheshwari V, Bhargava S, Jain A, Fatima U, Haq E. Histological  
369 Diagnosis of Madura Foot (Mycetoma): A Must for Definitive Treatment.  
370 Journal of Global Infectious Diseases. 2009; 1(1), 64–67.
- 371 12-Chufal SS, Thapliyal NC, Gupta MK. An approach to histology-based  
372 diagnosis and treatment of Madura foot. J Infect Dev Ctries. 2012; 6(9):684–  
373 8.
- 374 13-Ibrahim AI, El Hassan AM, Fahal A, van de Sande WW. A histopathological  
375 exploration of the *Madurella mycetomatis* grain. PLoS One.  
376 2013;8(3):e57774.
- 377 14-Efared B, Tahiri L, Boubacar MS, Atsam-Ebang G, Hammas N, Hinde EF,  
378 et al. Mycetoma in a non-endemic area: a diagnostic challenge. BMC  
379 Clinical Pathology. 2017; 17, 1.
- 380 15-EL Hag IA, Fahal AH, Khalil EAG. Fine needle aspiration cytology of  
381 Mycetoma. Acta Cytologica. 1996; 40(3): 461–46.
- 382 16-Fahal AH. Mycetoma thorn on the flesh Review article. Trans R Soc Trop  
383 Med Hyg. 2004; 98(1):3–11. Review. pmid:14702833
- 384 17-Zein HAM, Fahal AH, Mahgoub ES, EL Hassan T, Abdel Rahman ME. The  
385 Predictors of Cure, Amputation & Follow-up dropout among Mycetoma  
386 Patients as seen at The Mycetoma Research Centre, University of  
387 Khartoum. Trans R Soc Trop Med Hyg. 2012; 106(11):639–
- 388 18-van de Sande WWJ, Maghoub ES, Fahal AH, Goodfellow M, Welsh O,  
389 Zijlstra E. The Mycetoma Knowledge Gap: Identification of Research  
390 Priorities. PLoS Negl Trop Dis. 2014; 8(3): e2667. pmid:24675533

- 391 19-Mitjà O, Marks M, Bertran L, Kollie K, Argaw D, Fahal AH, et al. Integrated  
392 Control and Management of Neglected Tropical Skin Diseases. PLoS Negl  
393 Trop Dis. 2017; 11(1): e0005136. pmid:28103250
- 394 20-van de Sande WWJ, Fahal AH, Goodfellow M, Mahgoub ES, Welsh O,  
395 Zijlstra EE. Merits and Pitfalls of Currently Used Diagnostic Tools in  
396 Mycetoma. PLoS Negl Trop Dis. 2014; 8(7): e2918.
- 397 21-Hay RJ, Fahal AH. Mycetoma: an old and still neglected tropical disease.  
398 Trans R Soc Trop Med Hyg. 2015;109(3):169-70.
- 399 22- Welsh O, Al-Abdely HM, Salinas-Carmona MC, Fahal AH. Mycetoma  
400 Medical Therapy. PLoS Negl Trop Dis. 2014; 8(10): e3218.
- 401 23-van de Sande WWJ, Maghoub ES, Fahal AH, Goodfellow M, Welsh O,  
402 Zijlstra E. The Mycetoma Knowledge Gap: Identification of Research  
403 Priorities. PLoS Negl Trop Dis. 2014; 8(3): e2667.
- 404 24-EL Hag IA, Fahal AH, Gasim ET. Fine needle aspiration cytology of  
405 mycetoma. Acta Cytol. 1996; 40(3):461-4.
- 406 25-Ibrahim AI, El Hassan AM, Fahal A, van de Sande WW. A Histopathological  
407 Exploration of the *Madurella mycetomatis* Grain. PLoS ONE. 2013; 8(3):  
408 e57774.
- 409 26-Fahal AH. Mycetoma, Clinicopathological Monograph. Khartoum: Khartoum  
410 University Press, 2006.
- 411 27-Abd Bagi ME, Fahal AH, Sheik HE, Abdul Wahab O, Taifoor MK, et al.  
412 Pathological fractures in mycetoma. Trans R Soc Trop Med Hyg. 2003; 97:  
413 582–584.
- 414 28-Fahal AH, Sheik HE, Homeida MM, Arabi YE, Mahgoub ES (1997)  
415 Ultrasonographic imaging of mycetoma. Br J Surg 84: 1120–1122.
- 416 29-El Shamy ME, Fahal AH, Shakir MY, Homeida MM (2012) New MRI grading  
417 system for the diagnosis and management of mycetoma. Trans R Soc Trop  
418 Med Hyg 106: 738–742.
- 419 30-Ahmed AO, Mukhtar MM, Kools-Sijmons M, Fahal AH, de Hoog S, et al.  
420 (1999) Development of a species-specific PCR-restriction fragment length

- 421 polymorphism analysis procedure for identification of *Madurella*  
422 *mycetomatis*. *J Clin Microbiol* 37: 3175–3178.
- 423 31-Ahmed A, van de Sande W, Verbrugh H, Fahal A, van Belkum A. (2003)  
424 *Madurella mycetomatis* strains from mycetoma lesions in Sudanese  
425 patients are clonal. *J Clin Microbiol.* 41(10):4537–41. pmid:14532179.
- 426 32-Desnos-Ollivier M, Bretagne S, Dromer F, Lortholary O, Dannaoui E. (2006)  
427 Molecular identification of black-grain mycetoma agents. *J Clin Microbiol.*  
428 44(10):3517–23. pmid:17021076
- 429 33-Ahmed SA, van den Ende BHGG, Fahal AH, van de Sande WWJ, de Hoog  
430 GS (2014) Rapid Identification of Black Grain *Eumycetoma* Causative  
431 Agents Using Rolling Circle Amplification. *PLoS Negl Trop Dis* 8(12): e3368.  
432 pmid:25474355.
- 433 34-Ahmed SA, van de Sande WW, Desnos-Ollivier M, Fahal AH, Mahmoud  
434 NA, de Hoog GS. (2015) Application of Isothermal Amplification Techniques  
435 for Identification of *Madurella mycetomatis*, the Prevalent Agent of Human  
436 Mycetoma. *J Clin Microbiol.* 53(10):3280–5. pmid:26246484.
- 437 35-van de Sande WW, Gorkink R, Simons G, Ott A, Ahmed AO, Verbrugh H,  
438 et al. (2005) Genotyping of *Madurella mycetomatis* by selective  
439 amplification of restriction fragments (amplified fragment length  
440 polymorphism) and subtype correlation with geographical origin and lesion  
441 size. *J Clin Microbiol.* 43(9):4349–56. pmid:16145076.
- 442 36-Yousif BM, Fahal AH, Shakir MY. A new technique for the diagnosis of  
443 mycetoma using fixed blocks of aspirated material. *Trans R Soc Trop Med*  
444 *Hyg.* 2010 Jan;104(1):6-9.
- 445 37-van de Sande WWJ (2013) Global Burden of Human Mycetoma: A  
446 Systematic Review and Meta-analysis. *PLoS Negl Trop Dis* 7(11): e2550.
- 447 38-Destombes P, Mariat F, Rosati L, Segretain G (1977) [*Mycetoma* in Somalia  
448 - results of a survey done from 1959 to 1964]. *Acta Trop* 34: 355–373.
- 449 39-Destombes P. (1964). [Histologic Structure of Mycetomas]. *Ann Soc Belges*  
450 *Med Trop Parasitol Mycol* 44: 897–908.

- 451 40-Ndiaye B, Develoux M, Dieng MT, Kane A, Ndir O, Raphenon G, et al.  
452 Current report of mycetoma in Senegal: report of 109 cases. *Journal de*  
453 *Mycologie Médicale* 2000; 10(3): 140-144.
- 454 41-Verghese A, Klokke AH. Histologic diagnosis of species of fungus causing  
455 mycetoma. *Indian J Med Res.* 1966 Jun;54(6):524-30.
- 456 42-Fraser M, Borman AM, Johnson EM. Rapid and Robust Identification of the  
457 Agents of Black-Grain Mycetoma by Matrix-Assisted Laser Desorption  
458 Ionization–Time of Flight Mass Spectrometry. Diekema DJ, ed. *Journal of*  
459 *Clinical Microbiology.* 2017;55(8):2521-2528.
- 460 43-Quintana ET, Wierzbicka K, Mackiewicz P, Osman A, Fahal AH, Hamid ME,  
461 et al. *Streptomyces sudanensis* sp. nov., a new pathogen isolated from  
462 patients with actinomycetoma. *Antonie Van Leeuwenhoek.* 2008;93(3):305-  
463 13.
- 464 44-Trujillo ME, Goodfellow M. Polyphasic taxonomic study of clinically  
465 significant actinomadurae including the description of *Actinomadura latina*  
466 sp.nov. *Zentralbl Bakteriologie.* 1997 Jan;285(2):212-33.
- 467 45-Efared B, Tahiri L, Boubacar MS. Mycetoma in a non-endemic area: a  
468 diagnostic challenge. *BMC Clinical Pathology.* 2017; 17: 1.
- 469  
470  
471  
472  
473  
474  
475  
476  
477  
478  
479



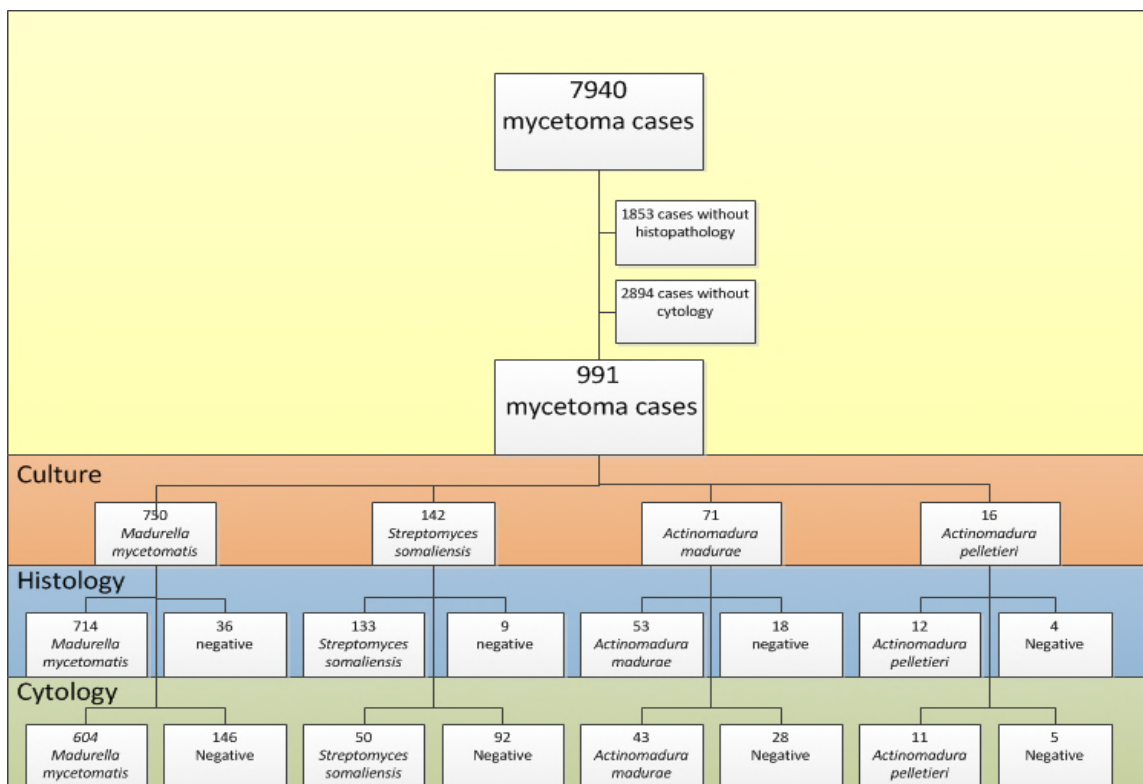

480

481 Fig 1: the study data collection method

482

483

484

485

486

487

488

489

490

491

492

493

494

495

496

497

498

499

500

501

502

503

504

505

506

507

508

509

510

511

512

513

514

515

516

517

518

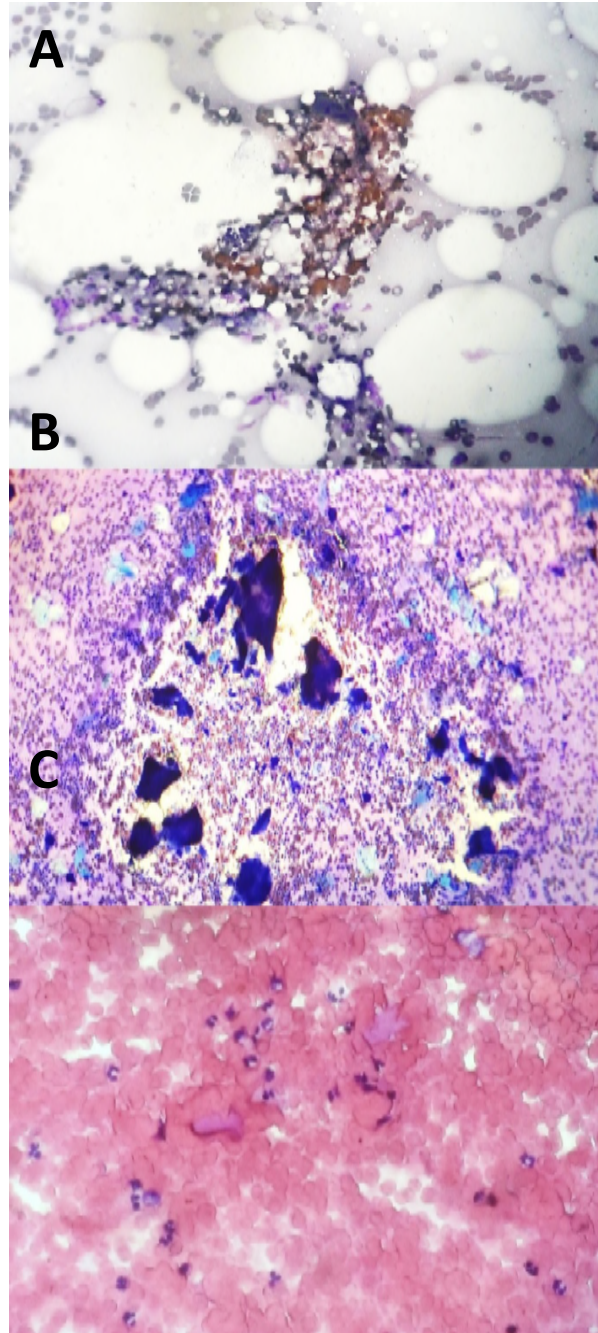

519 Fig 2: photomicroscopy of the cytopathological appearance of some mycetoma  
520 causative agents. *M. mycetomatis* (A), *A. pelletierii* (B), *S. somaliensis* in fine (H&E  
521 X10)

522

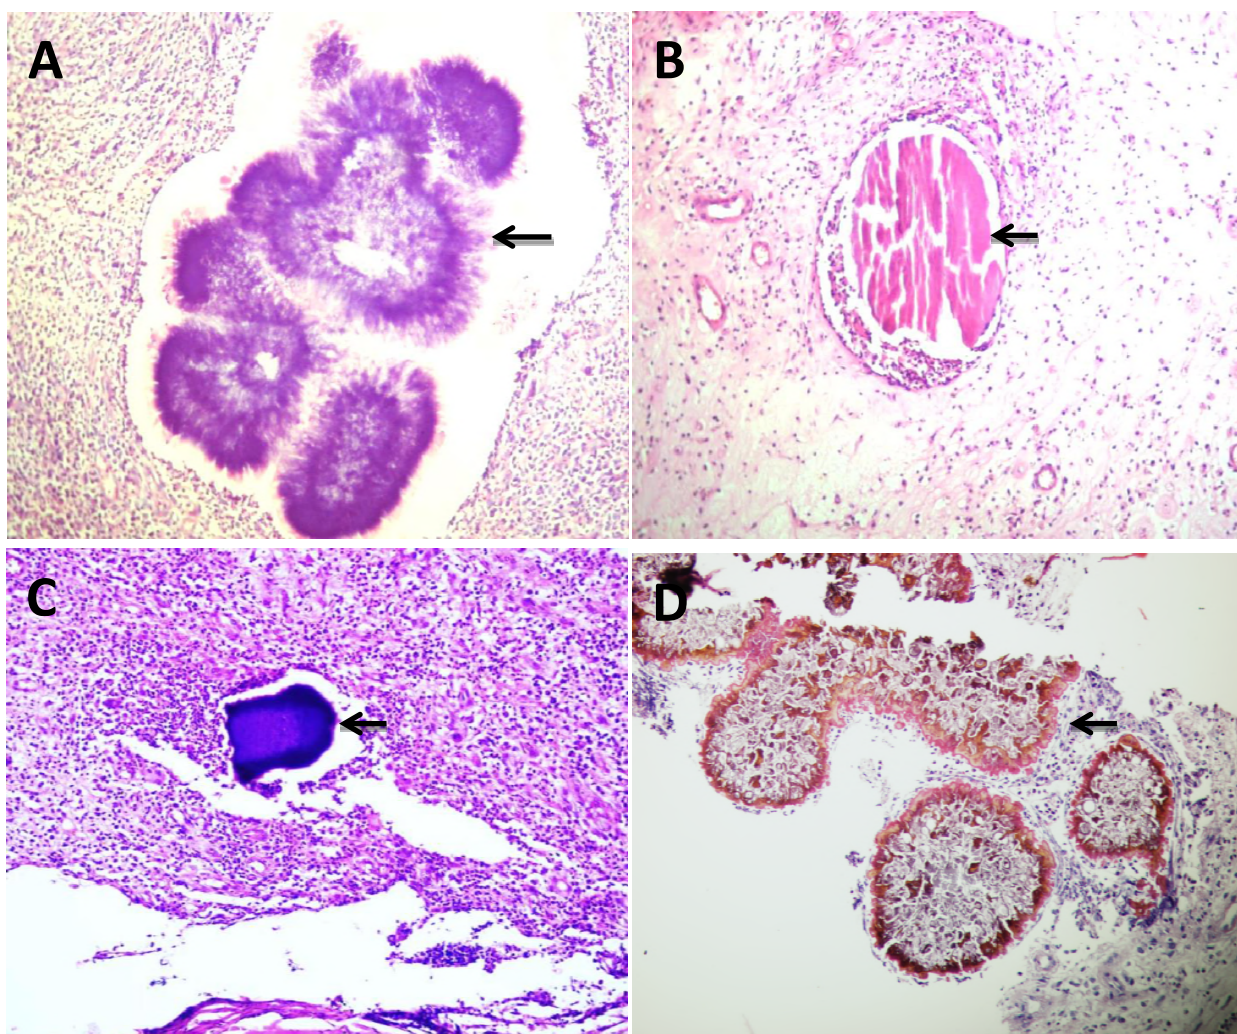

523

524

525 Fig 3. Histopathological appearance of mycetoma causative agents; *A. madurae*

526 (*A*), *S. somaliensis* (*B*), *A. pelletierii* (*C*) and *M. mycetomatis* (*D*). (H&E X10).

527

528

529

530

531

532

533

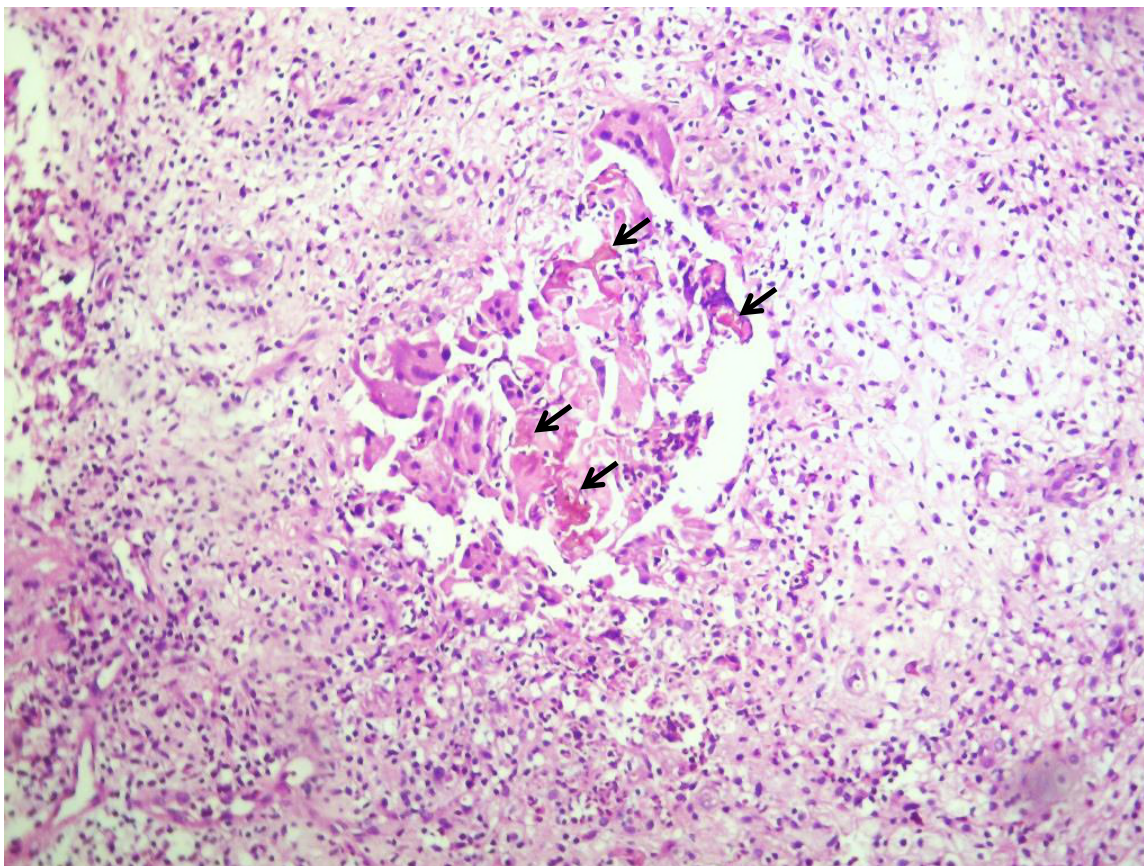

534

535 Fig 4: photomicroscopy showing histopathological section with histiocytes at the  
536 centre with sparse amount of *M. mycetomatis* the grains (arrows). It was reported  
537 first as false negative. (H&E X 10).

538

539

540

541

542

543

544

545

546

547

548

549

550

551

552

553

554

555

556

557

558

559

560

561

562

563

564

565

566

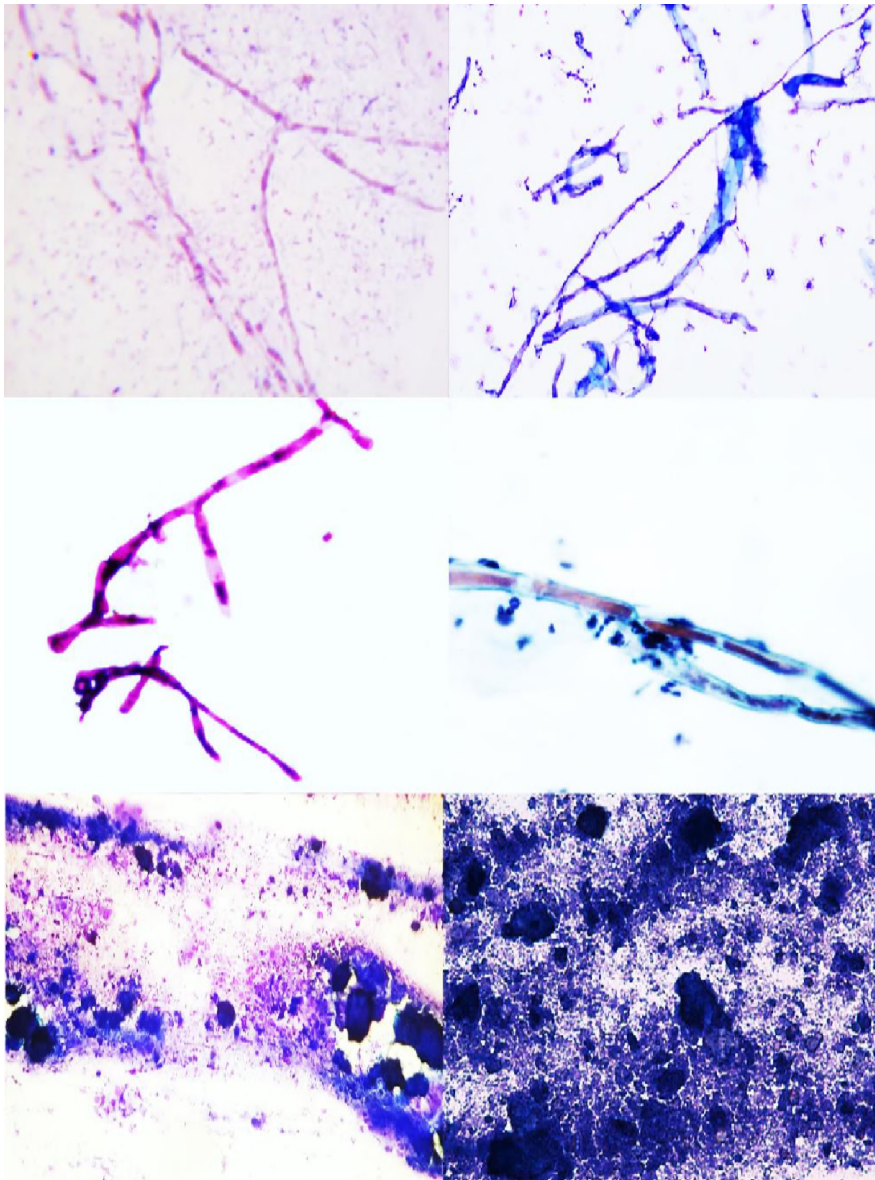

567 Fig 5: false positive identifications in cytology.

568 Showing cytological smears of (A) *M. mycetomatis* hyphae stained with Giemsa

569 stain, (B) Synthetic Fibers stained Wright-Giemsa stain. (Giemsa stain, X40). (C)

570 Smear showing hyphae of *M. mycetomatis*. (D) Smear showing elongated

571 structures of the Oedogoniales order. The chloroplasts form a chain interrupted by

572 clear zones (X40). (E) Smear showing *M. mycetomatis* grains after being crushed

573 on the smear. (F) smear with abundant calcific debris without intact cells taken

574 from patient with tumoral calcinosis (Diff Quick, X10).

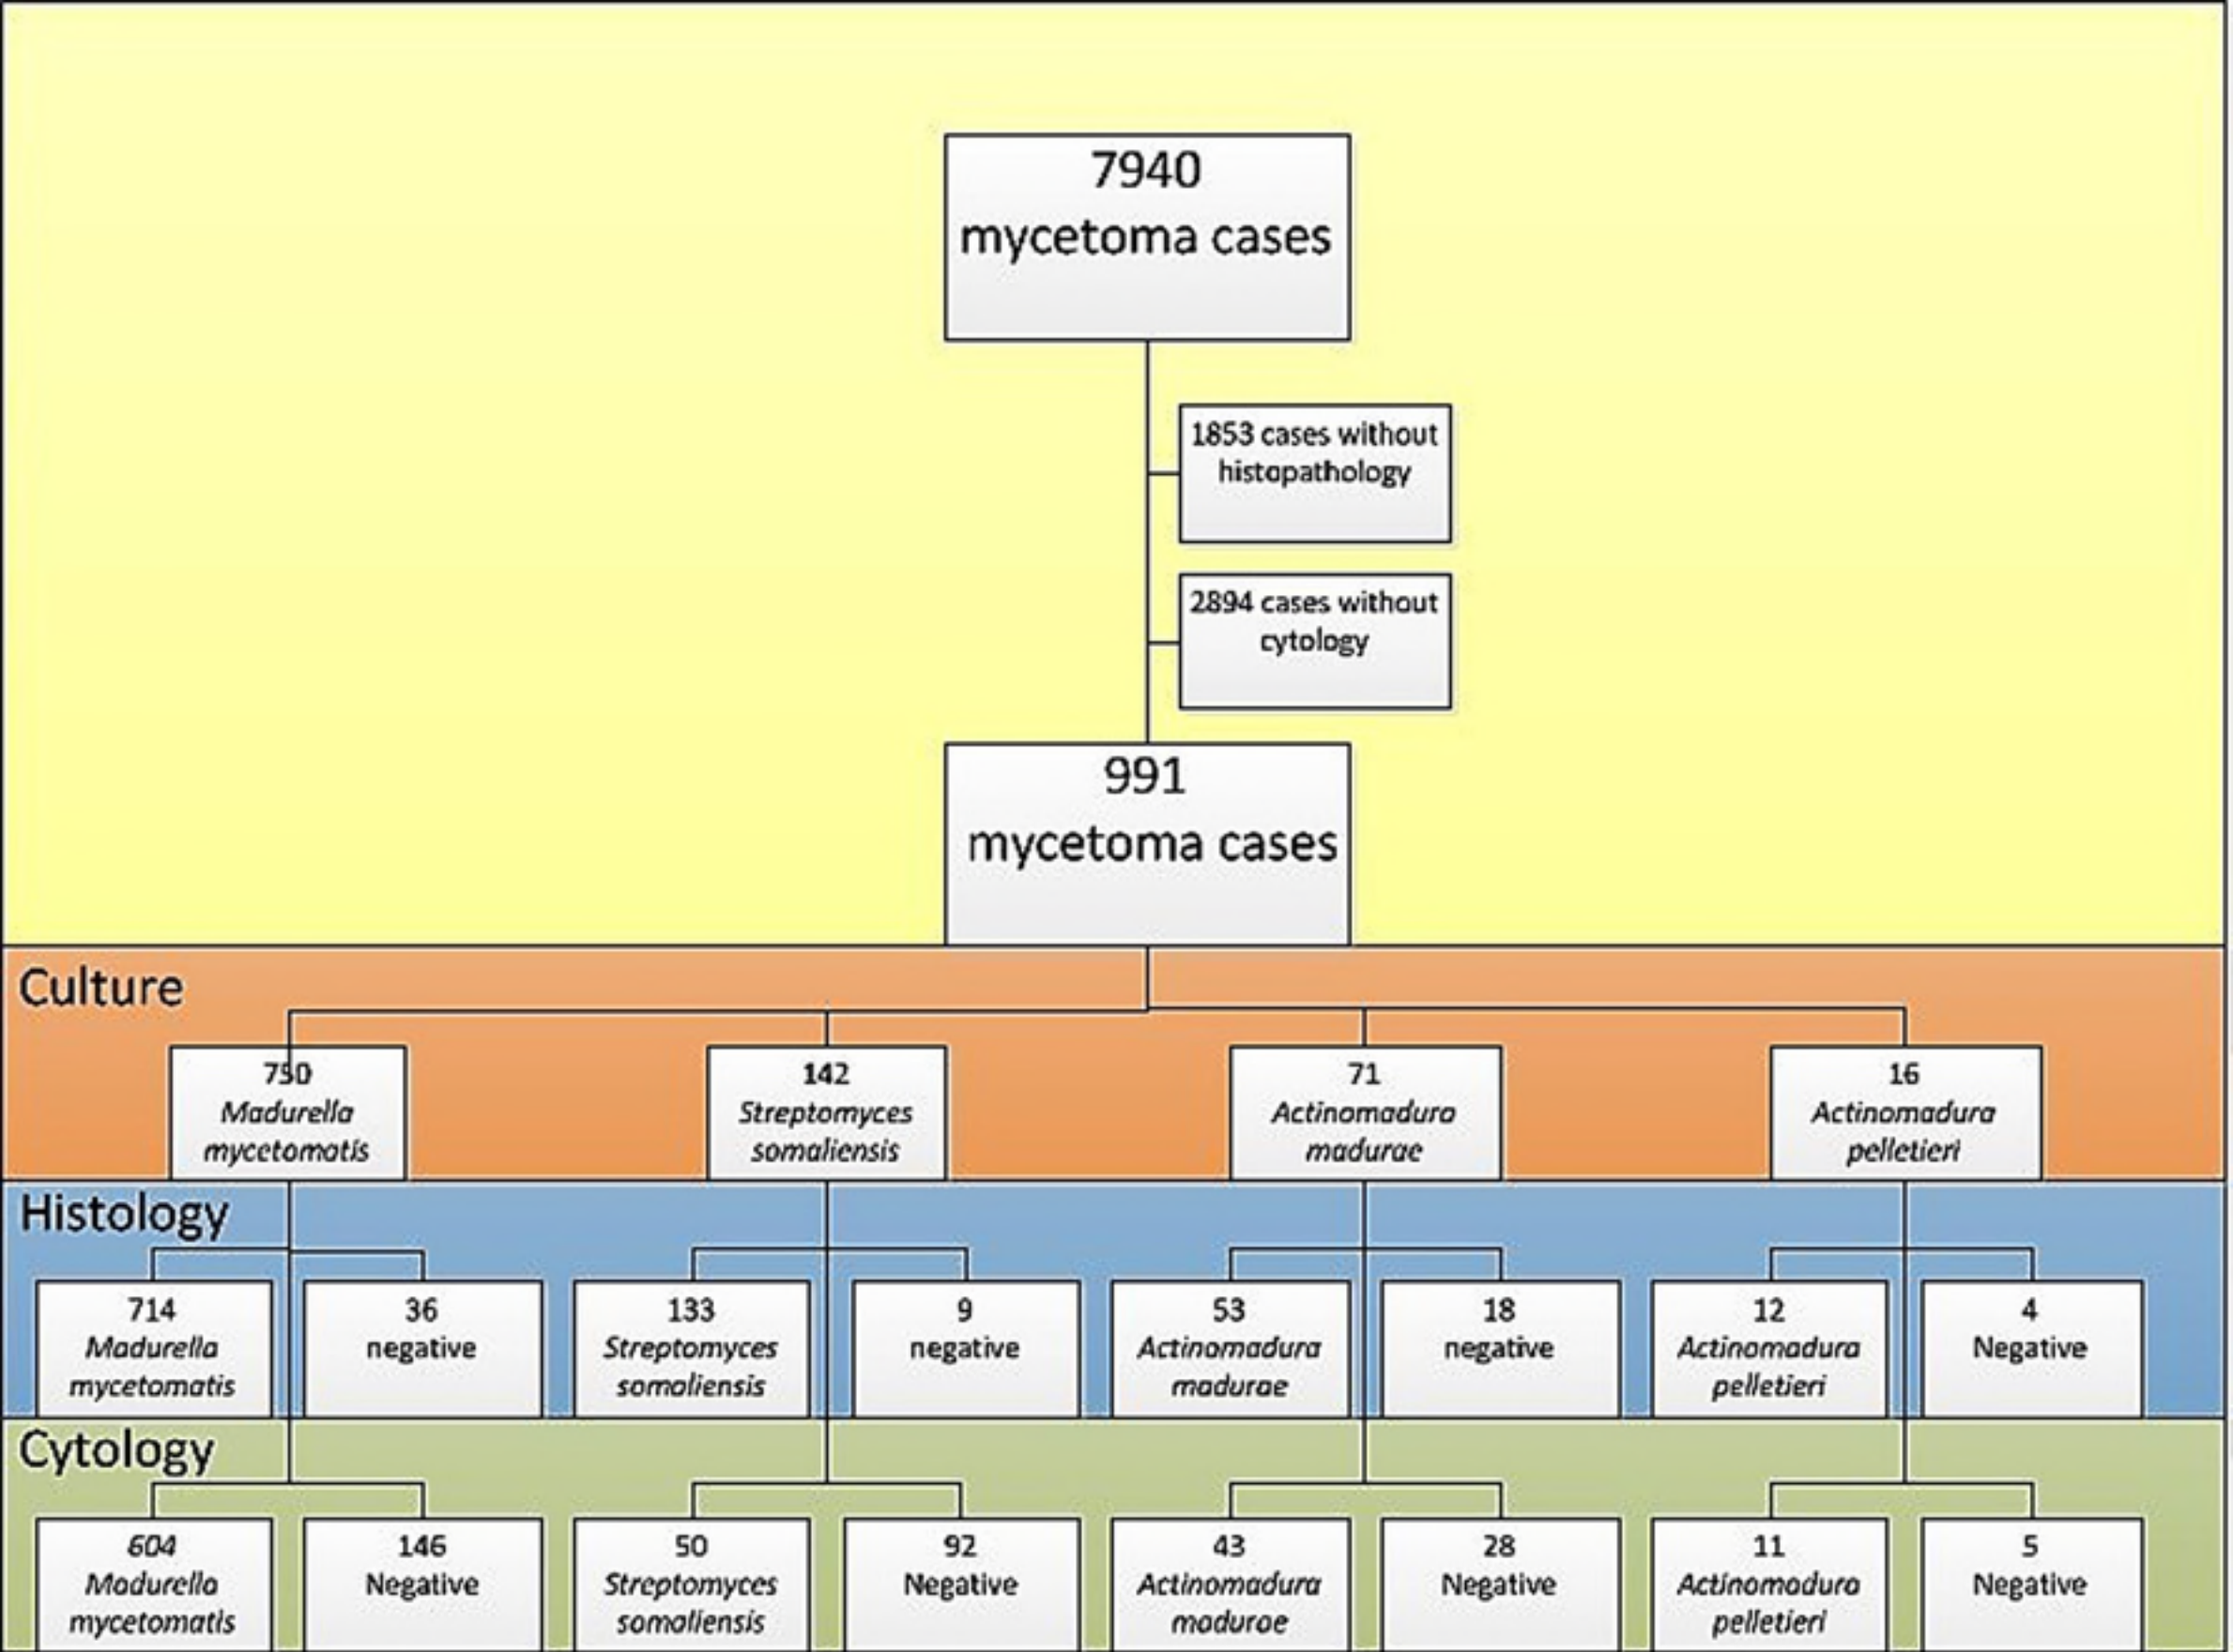

Fig 1

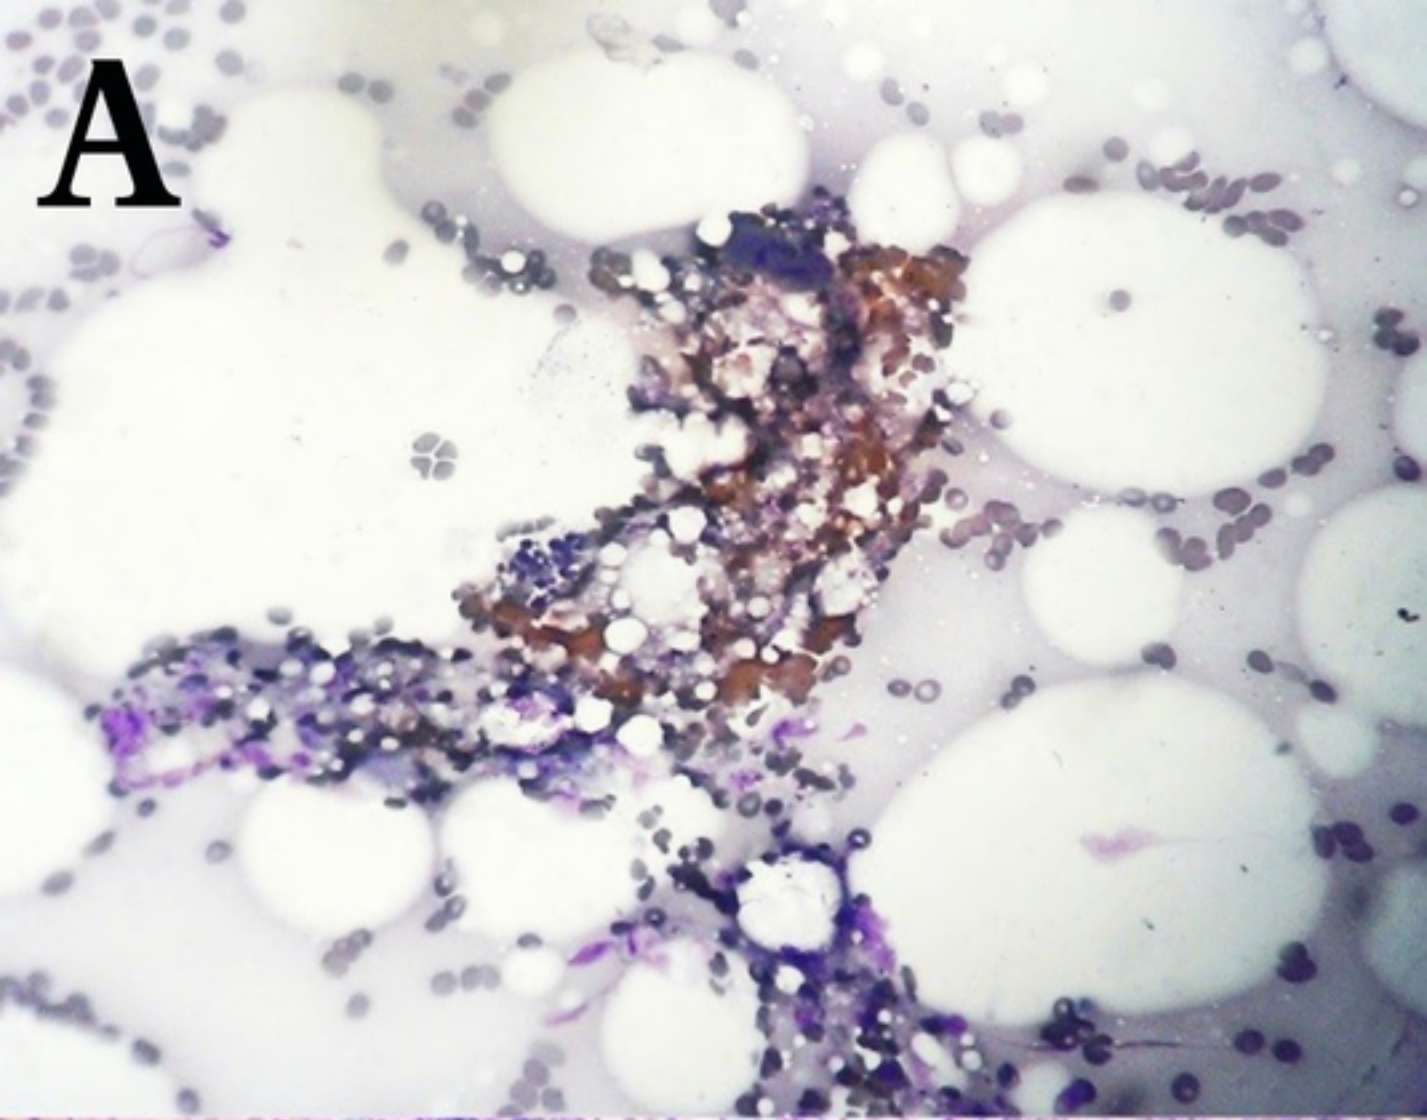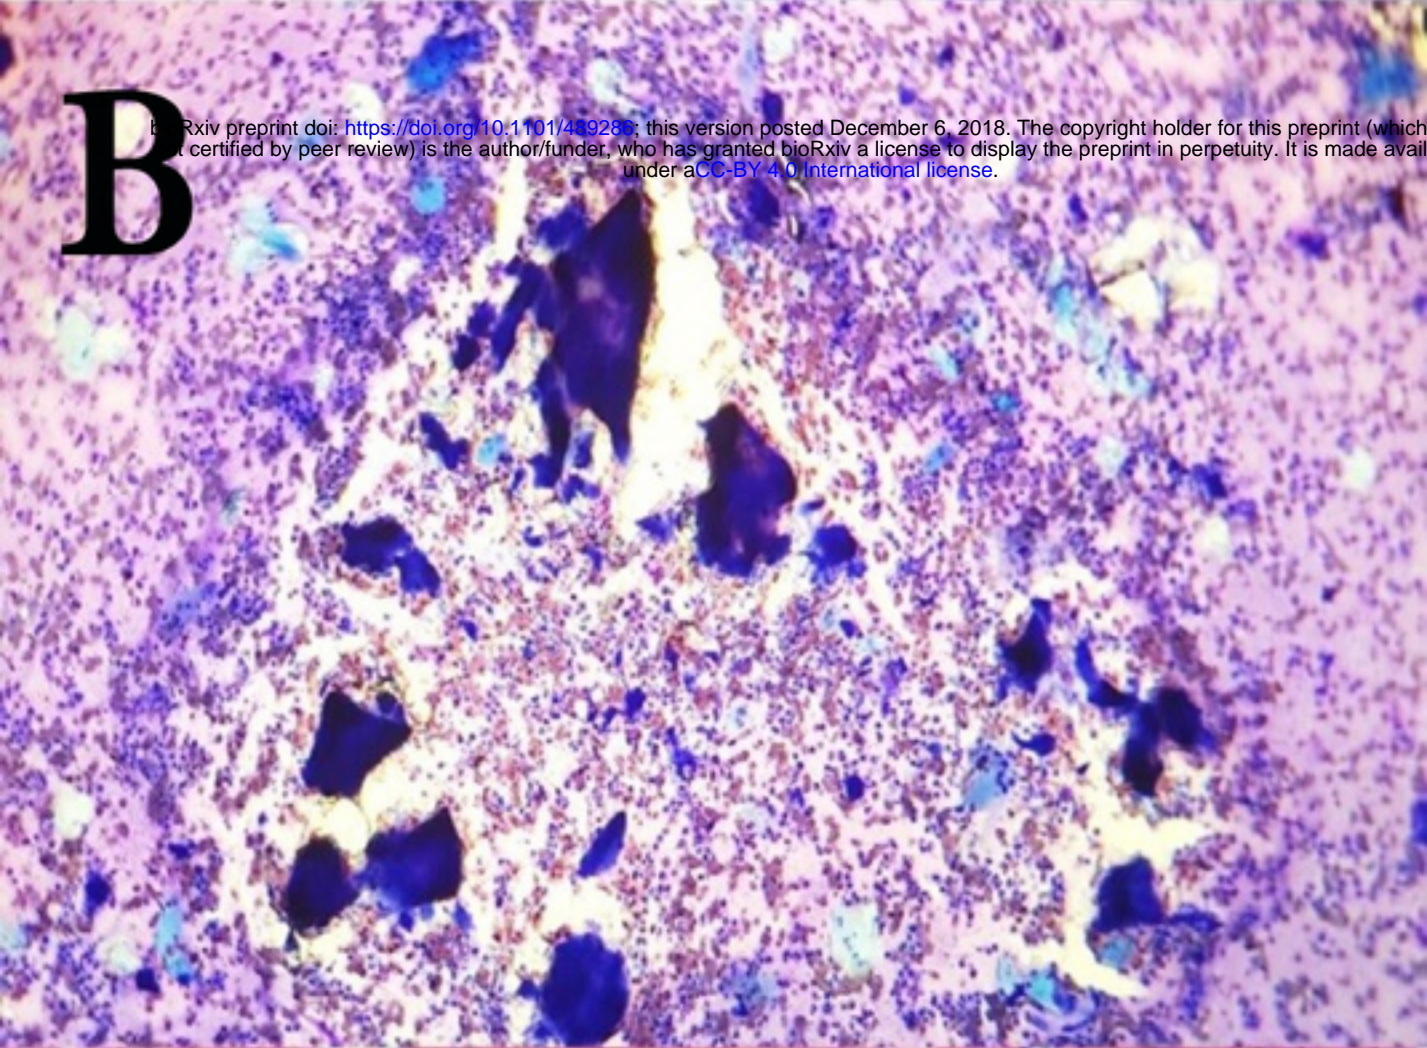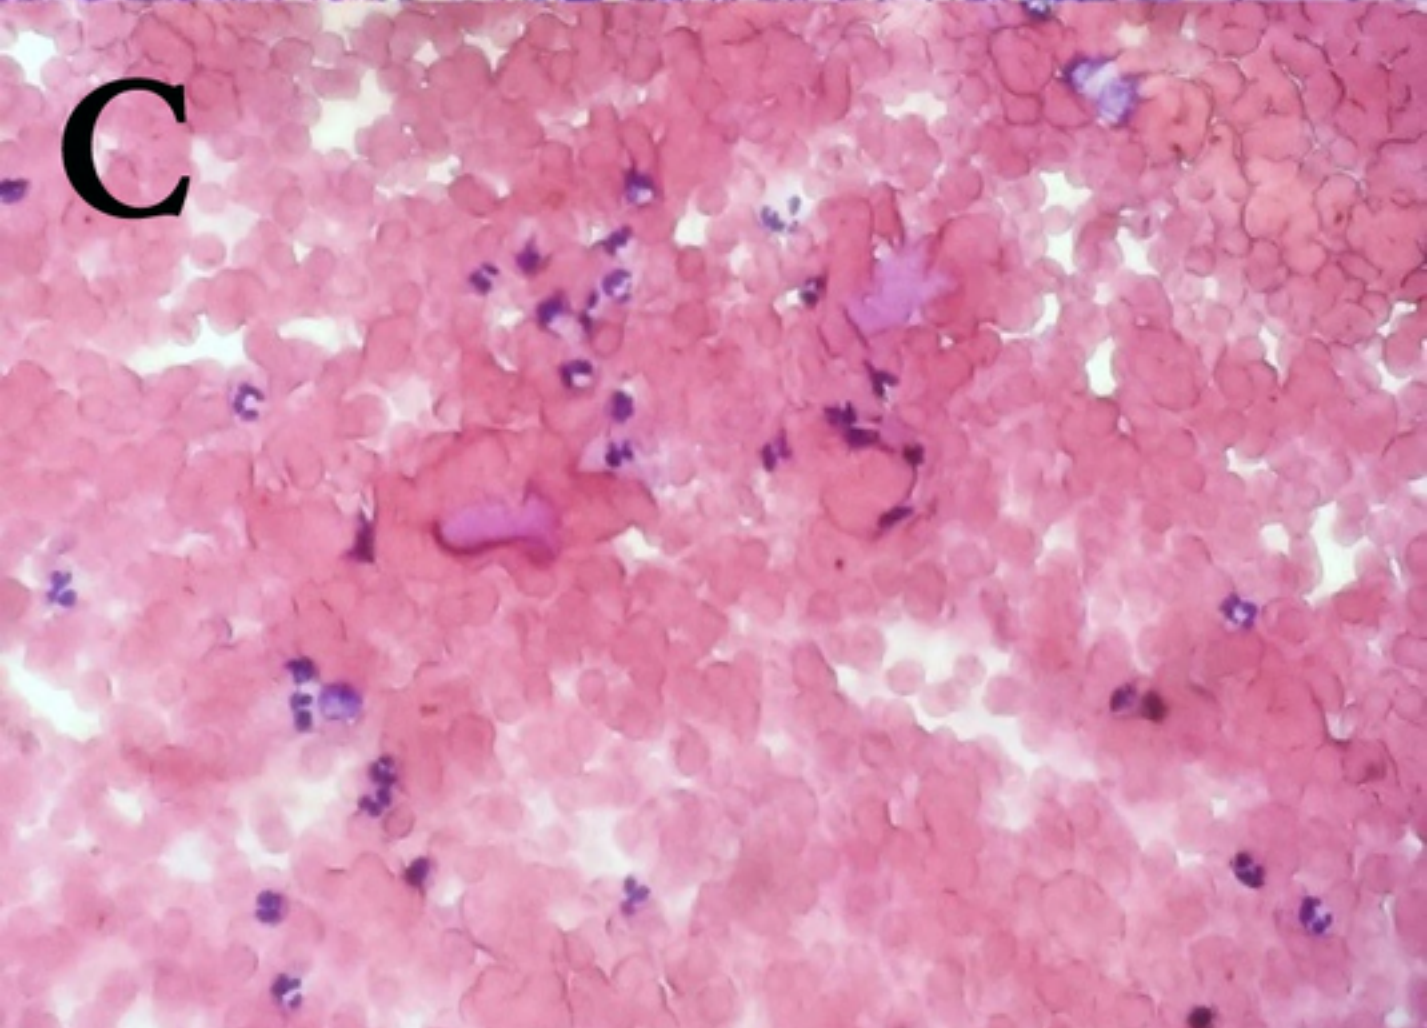

**Fig.2**

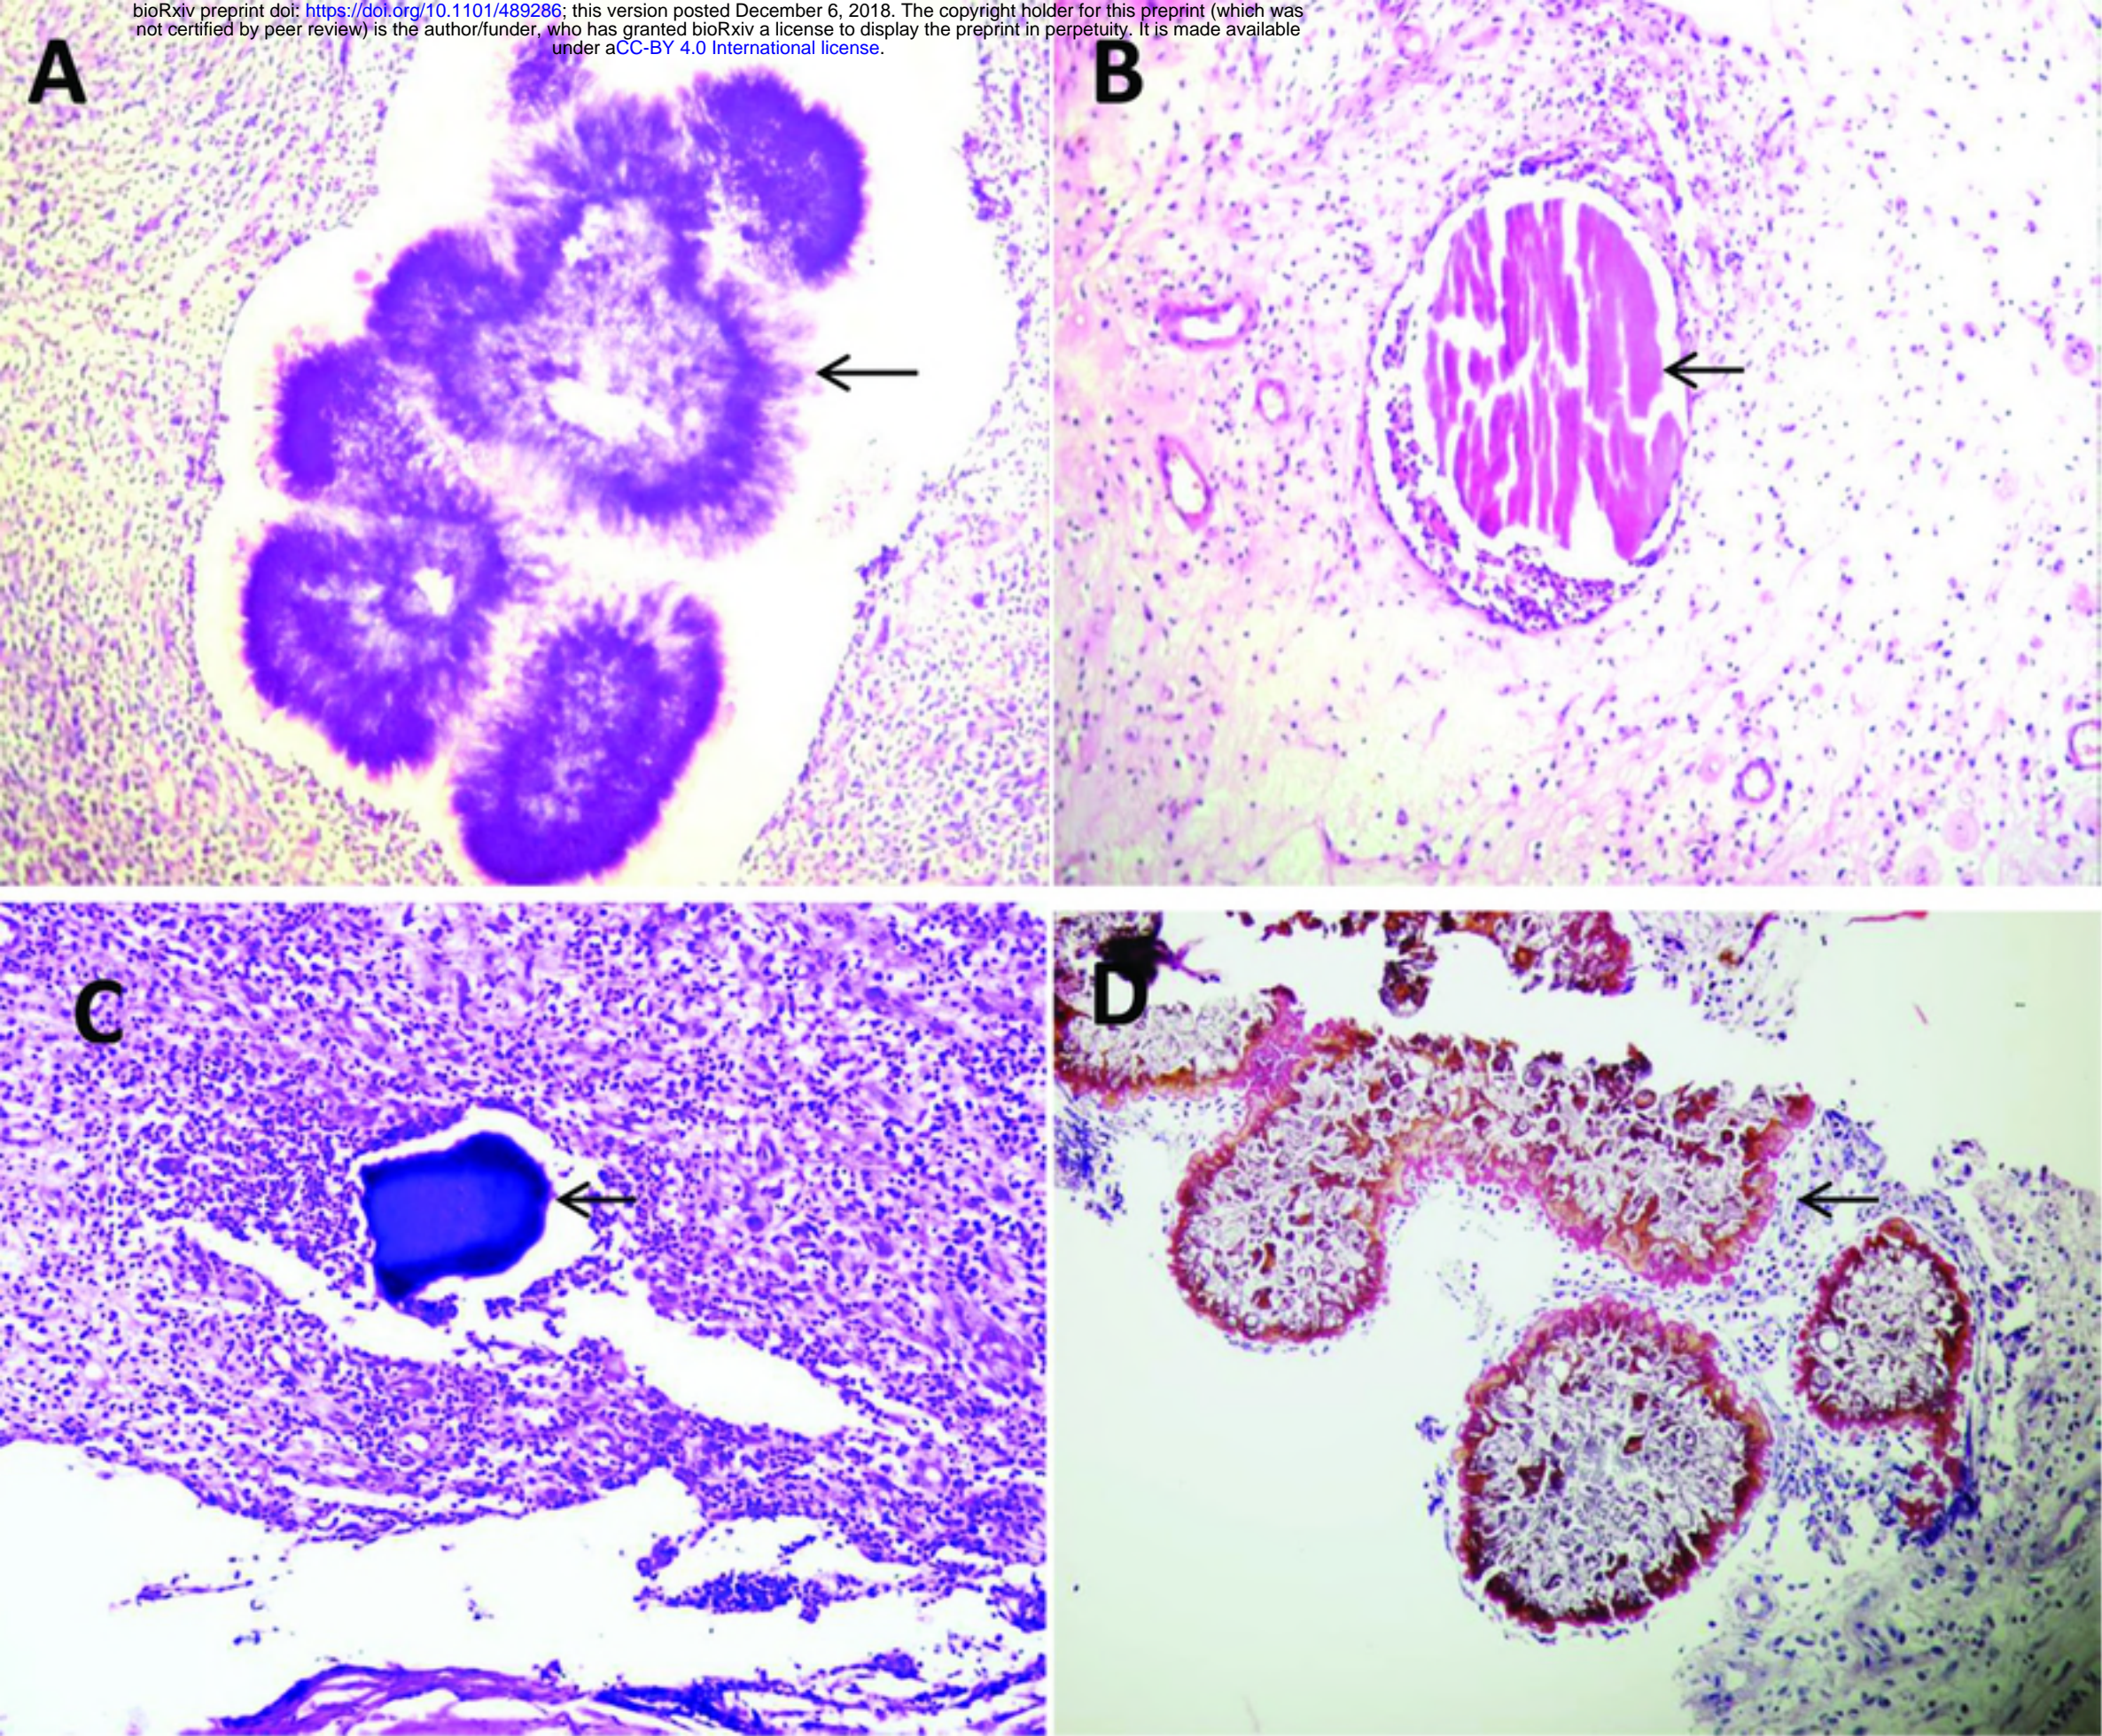

Fig. 3



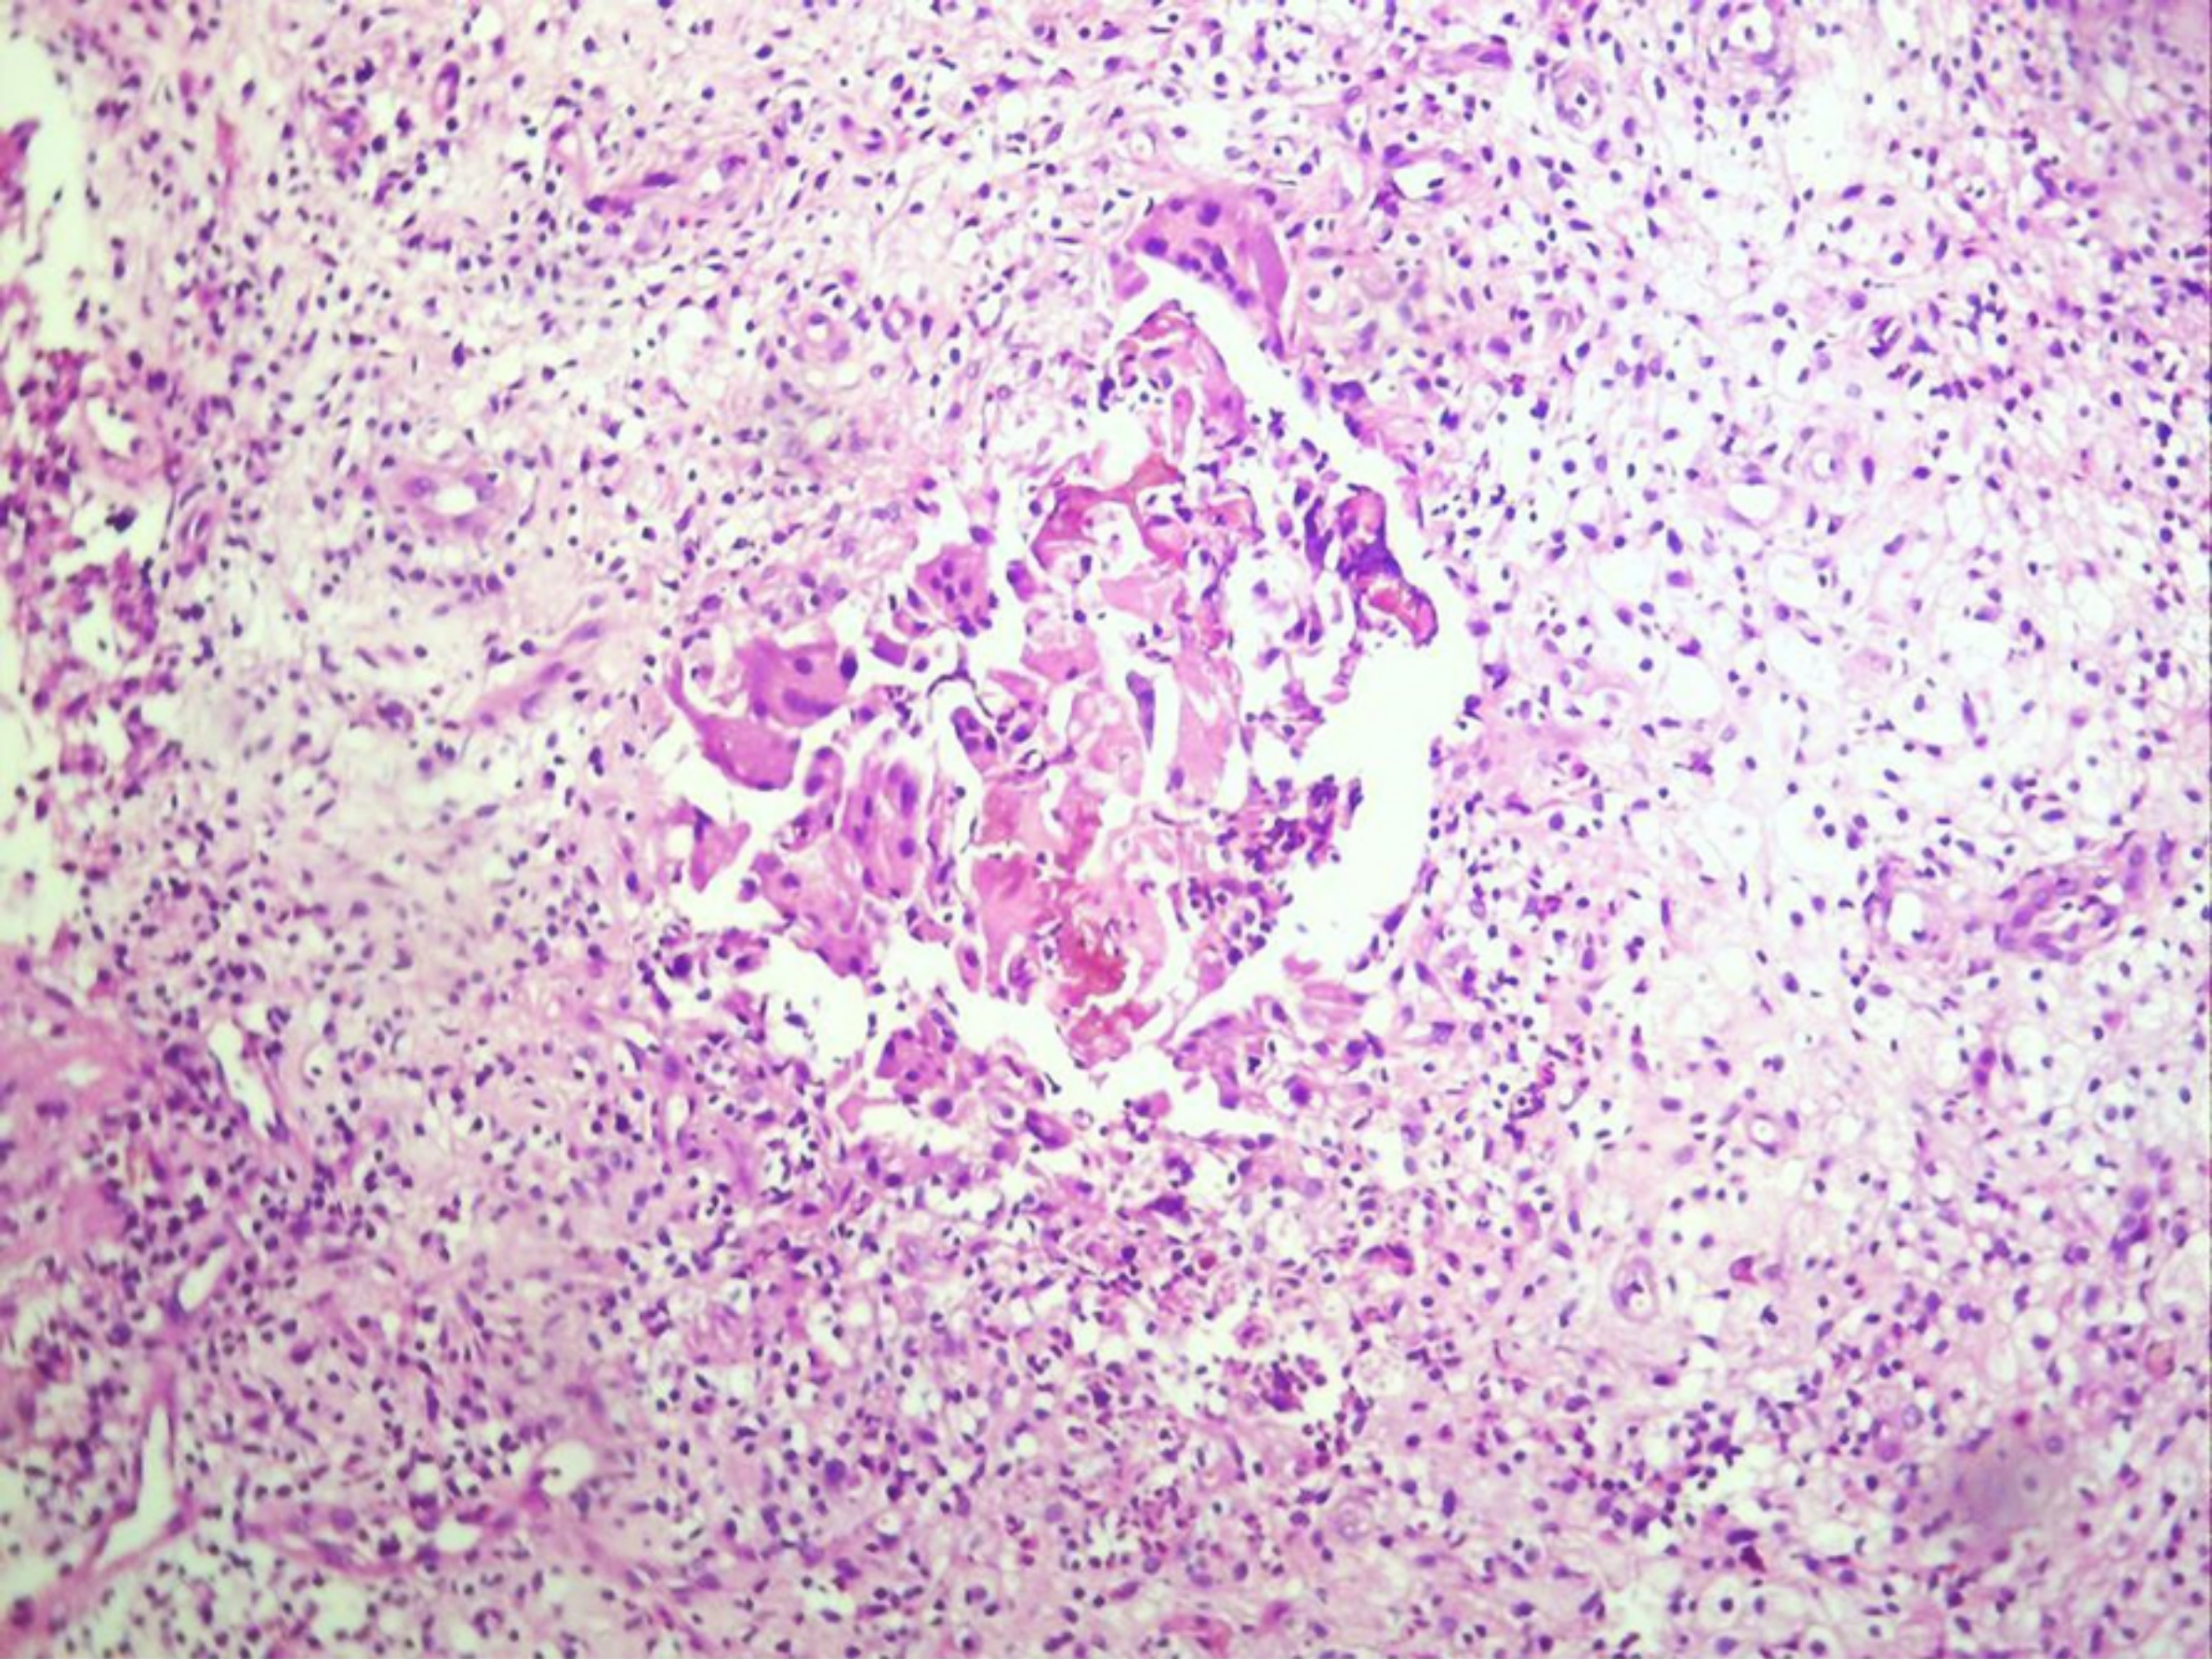

Fig.4

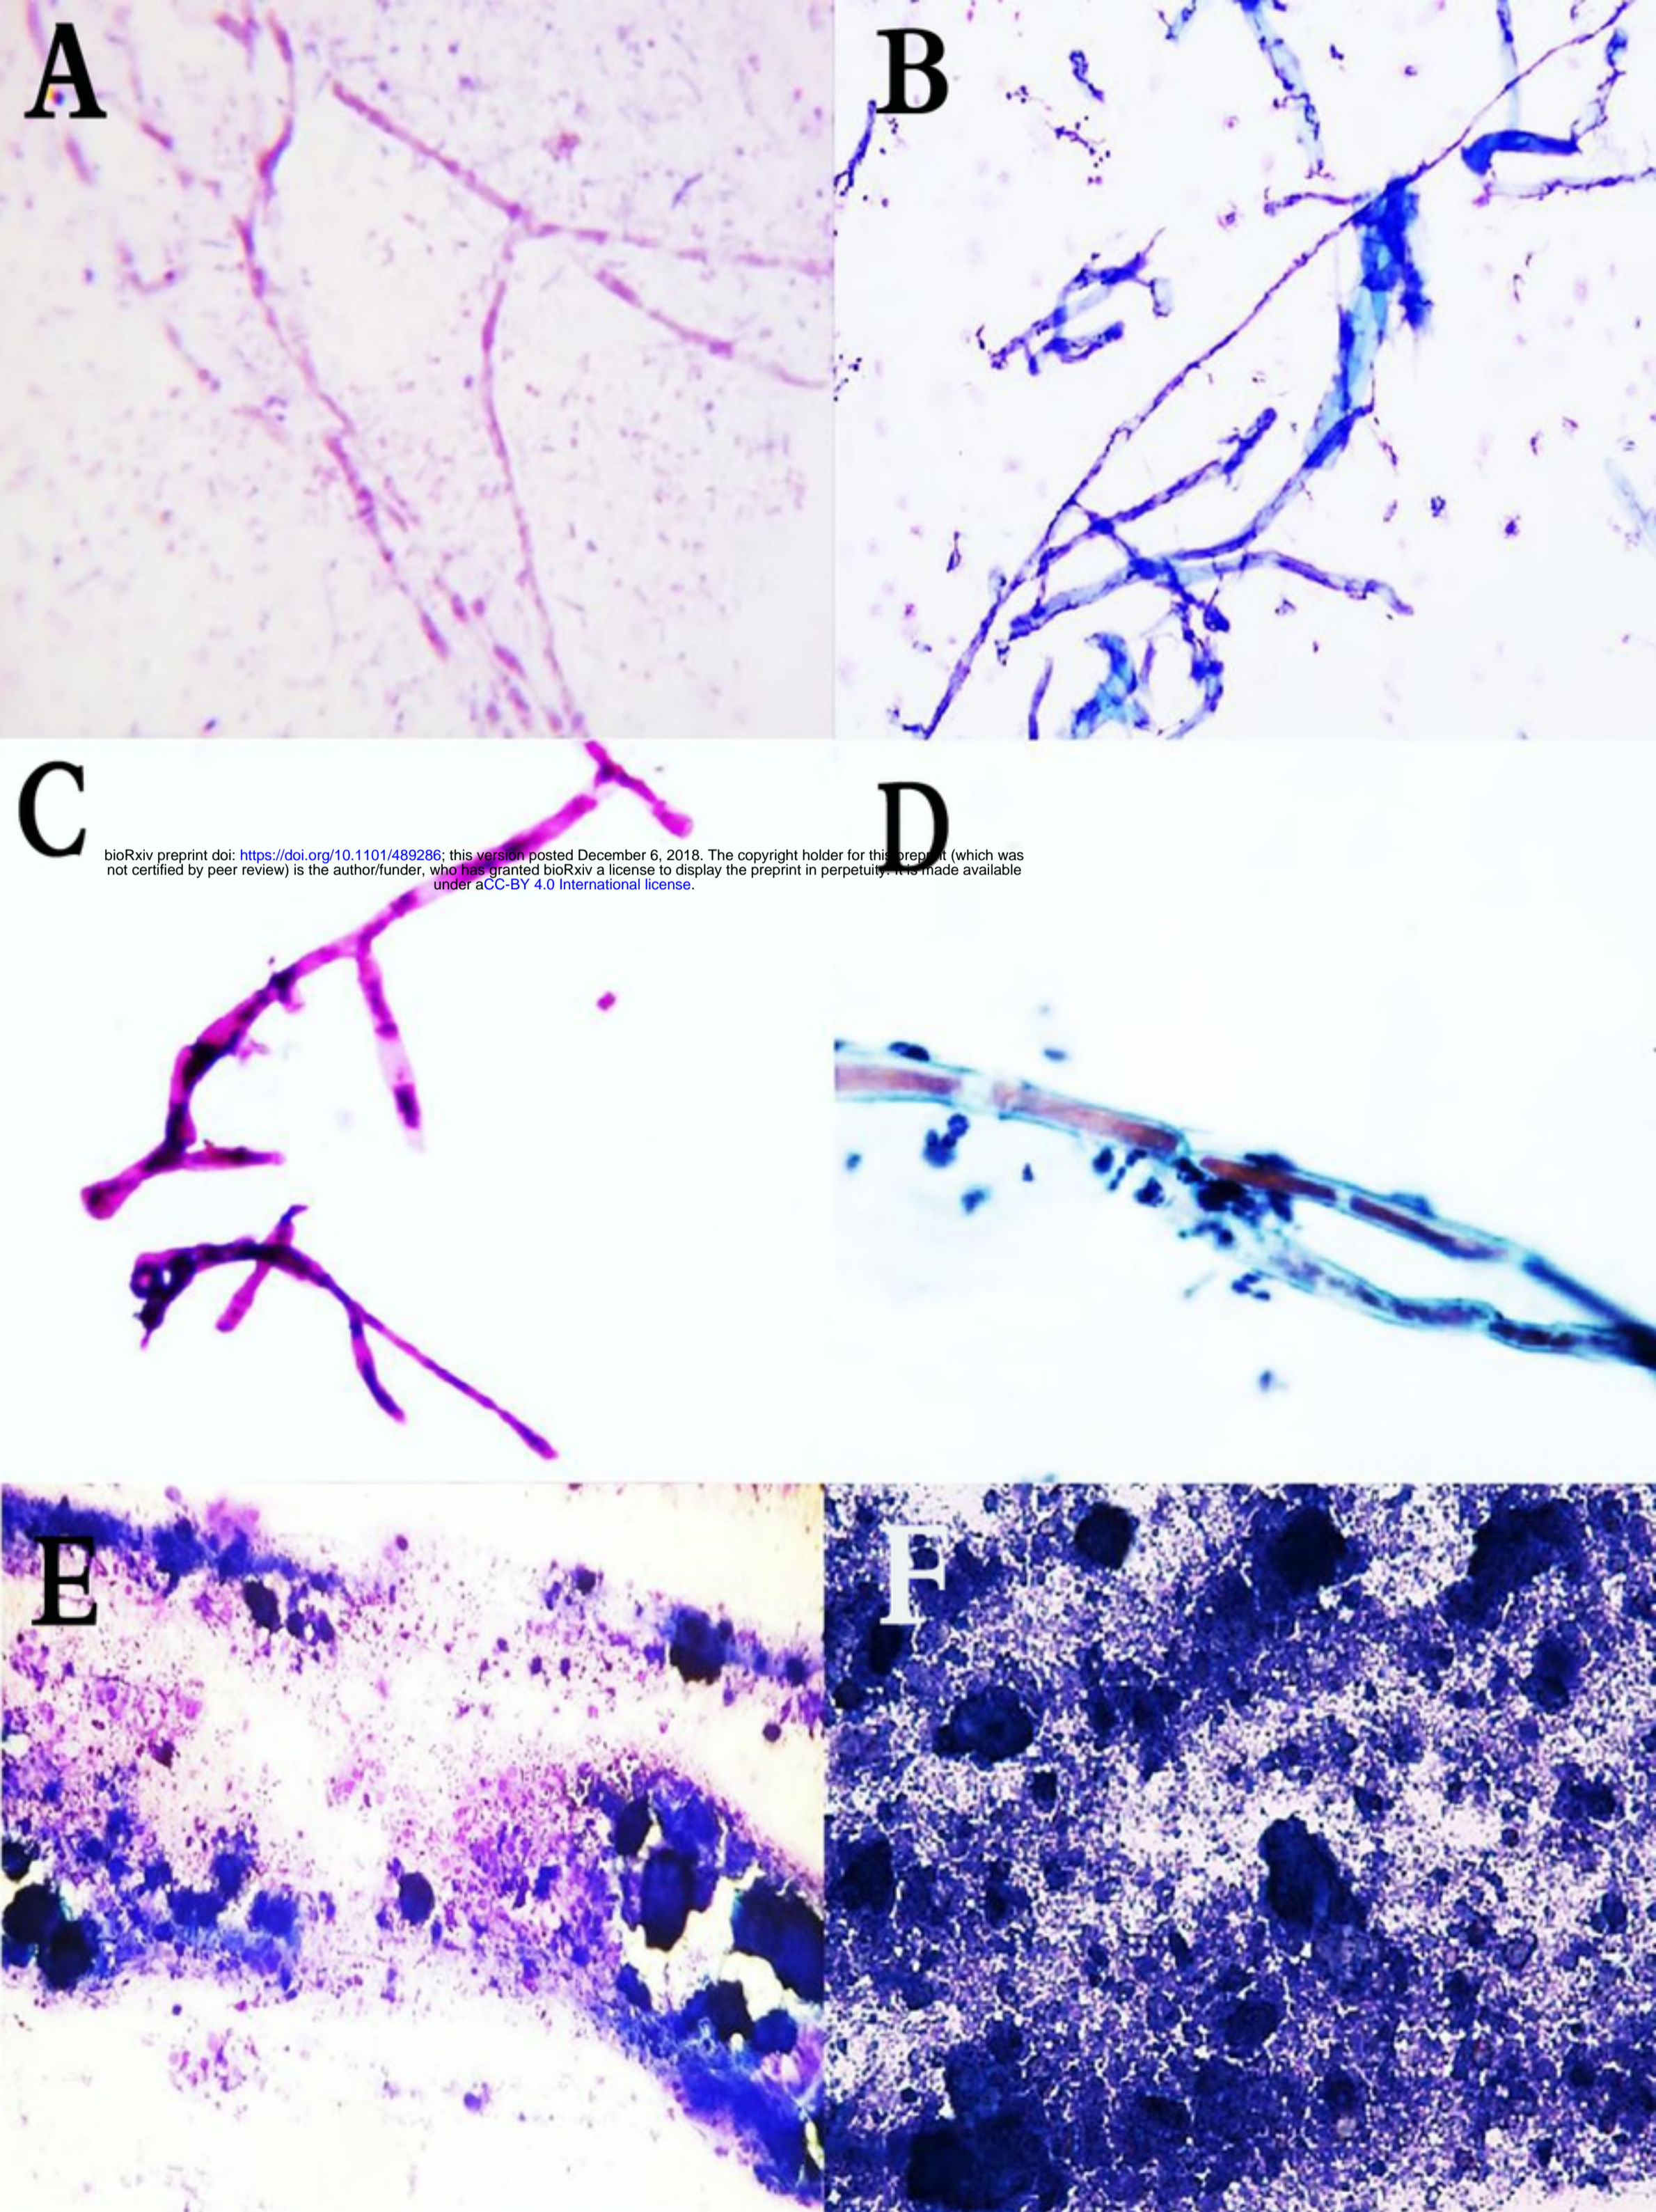

Figure
